# Supplementary material for: MKRMDA: multiple kernel learning-based Kronecker regularized least squares for MiRNA–disease association prediction
Source: J Transl Med. 2017 Dec 12;15:251. doi: 10.1186/s12967-017-1340-3 (PMC5727873; doi:10.1186/s12967-017-1340-3)
Supplement: Supplementary file 2 — Additional file 2. We further applied MKRMDA to predict candidate miRNAs for all the diseases involved in HMDDv2.0. Prediction results were publicly released for further research and experimental validation. [file 12967_2017_1340_MOESM2_ESM.xlsx]

## Sheet: Sheet1
Heart Failure	hsa-mir-331	0.608555
Carcinoma, Hepatocellular	hsa-mir-34b	0.56076
Colorectal Neoplasms	hsa-mir-125a	0.555094
Ovarian Neoplasms	hsa-mir-151	0.535339
Melanoma	hsa-mir-151	0.53219
Autistic Disorder	hsa-mir-663	0.526894
Carcinoma, Hepatocellular	hsa-mir-143	0.518584
Melanoma	hsa-mir-30c	0.502884
Stomach Neoplasms	hsa-mir-205	0.502459
Stomach Neoplasms	hsa-mir-92a	0.492038
Colorectal Neoplasms	hsa-mir-223	0.484462
Stomach Neoplasms	hsa-mir-15b	0.481403
Carcinoma, Hepatocellular	hsa-mir-132	0.479186
Colorectal Neoplasms	hsa-mir-191	0.478739
Stomach Neoplasms	hsa-mir-29b	0.476719
Stomach Neoplasms	hsa-mir-19b	0.474729
Carcinoma, Squamous Cell	hsa-mir-17	0.473375
Lupus Vulgaris	hsa-mir-663	0.472979
Esophageal Neoplasms	hsa-mir-200b	0.462027
Stomach Neoplasms	hsa-let-7b	0.460829
Melanoma	hsa-mir-92a	0.458251
Pancreatic Neoplasms	hsa-mir-141	0.456323
Carcinoma, Hepatocellular	hsa-mir-9	0.456159
Melanoma	hsa-mir-10b	0.455222
Melanoma	hsa-mir-181b	0.455046
Breast Neoplasms	hsa-mir-151	0.453426
Multiple Myeloma	hsa-mir-155	0.453407
Glioma	hsa-mir-92a	0.452569
Glioma	hsa-mir-137	0.448921
Colorectal Neoplasms	hsa-mir-24	0.44468
Stomach Neoplasms	hsa-mir-30d	0.442284
Colorectal Neoplasms	hsa-mir-106b	0.440857
Stomach Neoplasms	hsa-mir-210	0.438912
Muscular Disorders, Atrophic	hsa-mir-151	0.437612
Breast Neoplasms	hsa-mir-92b	0.433967
Carcinoma, Non-Small-Cell Lung	hsa-let-7c	0.430665
Pancreatic Neoplasms	hsa-mir-19a	0.43037
Lung Neoplasms	hsa-mir-106b	0.428785
Lung Neoplasms	hsa-mir-195	0.428562
Stomach Neoplasms	hsa-mir-203	0.428128
Glioma	hsa-mir-19a	0.42774
Stomach Neoplasms	hsa-let-7c	0.427125
Prostatic Neoplasms	hsa-mir-429	0.426739
Neoplasms	hsa-mir-451	0.426547
Neoplasms	hsa-mir-146b	0.425455
Lung Neoplasms	hsa-mir-20b	0.425048
Muscular Disorders, Atrophic	hsa-mir-206	0.424541
Leukemia, Myeloid, Acute	hsa-mir-34c	0.423624
Colorectal Neoplasms	hsa-mir-101	0.422602
Neoplasms	hsa-mir-135b	0.421168
Lung Neoplasms	hsa-mir-16	0.420879
Neoplasms	hsa-mir-223	0.419524
Ovarian Neoplasms	hsa-mir-7	0.417921
Prostatic Neoplasms	hsa-mir-155	0.417182
Breast Neoplasms	hsa-mir-106a	0.416655
Head and Neck Neoplasms	hsa-mir-200a	0.415384
Stomach Neoplasms	hsa-let-7d	0.415291
Colorectal Neoplasms	hsa-let-7d	0.41504
Carcinoma, Squamous Cell	hsa-mir-146b	0.414778
Prostatic Neoplasms	hsa-let-7e	0.414512
Ovarian Neoplasms	hsa-mir-222	0.414337
Stomach Neoplasms	hsa-mir-15a	0.414297
Esophageal Neoplasms	hsa-mir-1	0.41362
Melanoma	hsa-mir-223	0.412901
Stomach Neoplasms	hsa-let-7e	0.412586
Breast Neoplasms	hsa-mir-142	0.412489
Adenocarcinoma	hsa-mir-141	0.411452
Heart Failure	hsa-mir-20a	0.411411
Colorectal Neoplasms	hsa-mir-15b	0.411287
Glioma	hsa-mir-19b	0.411222
Breast Neoplasms	hsa-mir-130a	0.408864
Carcinoma, Squamous Cell	hsa-mir-19a	0.407814
Carcinoma, Hepatocellular	hsa-mir-30e	0.407694
Pancreatic Neoplasms	hsa-mir-1	0.407159
Hepatitis, Chronic	hsa-mir-122	0.406875
Lymphoma	hsa-mir-125b	0.406221
Lung Neoplasms	hsa-mir-92b	0.405821
Carcinoma, Renal Cell	hsa-mir-15a	0.405239
Carcinoma, Hepatocellular	hsa-mir-23b	0.405165
Colorectal Neoplasms	hsa-mir-132	0.403976
Carcinoma, Hepatocellular	hsa-mir-95	0.403627
Carcinoma, Renal Cell	hsa-mir-125b	0.403228
Carcinoma, Hepatocellular	hsa-mir-135b	0.40302
Melanoma	hsa-mir-24	0.402931
Colorectal Neoplasms	hsa-mir-296	0.402487
Breast Neoplasms	hsa-mir-150	0.402255
Stomach Neoplasms	hsa-mir-451	0.402028
Pancreatic Neoplasms	hsa-mir-127	0.400821
Stomach Neoplasms	hsa-mir-30a	0.400052
Pancreatic Neoplasms	hsa-mir-125a	0.399389
Colorectal Neoplasms	hsa-mir-205	0.399379
Melanoma	hsa-mir-92b	0.398177
Colorectal Neoplasms	hsa-mir-15a	0.397751
Head and Neck Neoplasms	hsa-mir-200b	0.397617
Stomach Neoplasms	hsa-let-7i	0.397347
Colorectal Neoplasms	hsa-let-7f	0.396786
Colorectal Neoplasms	hsa-mir-100	0.396427
Breast Neoplasms	hsa-mir-30e	0.393887
Breast Neoplasms	hsa-mir-372	0.391651
Colorectal Neoplasms	hsa-mir-214	0.390596
Colorectal Neoplasms	hsa-let-7i	0.390416
Colorectal Neoplasms	hsa-mir-192	0.390338
Ovarian Neoplasms	hsa-mir-143	0.389669
Carcinoma, Squamous Cell	hsa-mir-183	0.389653
Ovarian Neoplasms	hsa-mir-203	0.388856
Carcinoma, Squamous Cell	hsa-mir-221	0.388648
Pancreatic Neoplasms	hsa-mir-205	0.387977
Stomach Neoplasms	hsa-mir-92b	0.387743
Adenocarcinoma	hsa-mir-34a	0.387721
Carcinoma, Renal Cell	hsa-mir-192	0.387699
Pancreatic Neoplasms	hsa-mir-19b	0.386683
Ovarian Neoplasms	hsa-mir-18b	0.386632
Carcinoma, Renal Cell	hsa-mir-19b	0.386455
Prostatic Neoplasms	hsa-mir-18a	0.385564
Prostatic Neoplasms	hsa-let-7i	0.385113
Urinary Bladder Neoplasms	hsa-mir-223	0.3844
Stomach Neoplasms	hsa-mir-520b	0.384363
Carcinoma, Non-Small-Cell Lung	hsa-let-7f	0.384352
Prostatic Neoplasms	hsa-mir-19a	0.383649
Melanoma	hsa-mir-132	0.383302
Carcinoma, Hepatocellular	hsa-mir-429	0.383142
Leukemia, Myeloid, Acute	hsa-mir-16	0.382788
Breast Neoplasms	hsa-mir-451	0.382194
Ovarian Neoplasms	hsa-mir-210	0.381365
Ovarian Neoplasms	hsa-mir-205	0.381248
Glioblastoma	hsa-mir-125a	0.379603
Breast Neoplasms	hsa-mir-98	0.377749
Stomach Neoplasms	hsa-mir-99b	0.377442
Urinary Bladder Neoplasms	hsa-mir-125a	0.376105
Stomach Neoplasms	hsa-mir-30e	0.375715
Carcinoma, Non-Small-Cell Lung	hsa-mir-375	0.37504
Melanoma	hsa-mir-29c	0.373748
Carcinoma, Non-Small-Cell Lung	hsa-mir-10b	0.373242
Prostatic Neoplasms	hsa-mir-210	0.373201
Mesothelioma	hsa-mir-19a	0.372087
Esophageal Neoplasms	hsa-mir-125b	0.371552
Melanoma	hsa-mir-127	0.371479
Adenocarcinoma	hsa-mir-125b	0.370923
Carcinoma, Hepatocellular	hsa-mir-32	0.370709
Neoplasms	hsa-mir-195	0.369455
Colonic Neoplasms	hsa-mir-222	0.368864
Carcinoma, Renal Cell	hsa-mir-296	0.368623
Prostatic Neoplasms	hsa-let-7f	0.367798
Ovarian Neoplasms	hsa-mir-29c	0.367717
Colorectal Neoplasms	hsa-mir-20b	0.366743
Carcinoma, Non-Small-Cell Lung	hsa-mir-200a	0.366543
Carcinoma, Non-Small-Cell Lung	hsa-let-7e	0.365923
Carcinoma, Non-Small-Cell Lung	hsa-mir-203	0.365865
Urinary Bladder Neoplasms	hsa-mir-146b	0.365523
Lymphoma	hsa-mir-223	0.365265
Carcinoma, Squamous Cell	hsa-let-7a	0.365244
Carcinoma, Renal Cell	hsa-mir-125a	0.364562
Stomach Neoplasms	hsa-mir-23b	0.364238
Lymphoma, T-Cell	hsa-mir-155	0.36389
Glioma	hsa-mir-135b	0.363643
Melanoma	hsa-mir-451	0.363066
Carcinoma, Squamous Cell	hsa-mir-150	0.362622
Prostatic Neoplasms	hsa-mir-19b	0.361069
Lung Neoplasms	hsa-mir-130a	0.36101
Carcinoma, Hepatocellular	hsa-mir-133a	0.360979
Carcinoma, Non-Small-Cell Lung	hsa-mir-194	0.360315
Prostatic Neoplasms	hsa-mir-125a	0.360253
Retinoblastoma	hsa-mir-21	0.359476
Prostatic Neoplasms	hsa-mir-196a	0.359437
Colorectal Neoplasms	hsa-mir-302b	0.358422
Lung Neoplasms	hsa-mir-15a	0.357245
Carcinoma, Non-Small-Cell Lung	hsa-mir-132	0.356113
Carcinoma, Renal Cell	hsa-mir-17	0.355457
Prostatic Neoplasms	hsa-mir-18b	0.353918
Esophageal Neoplasms	hsa-mir-142	0.353891
Colorectal Neoplasms	hsa-let-7g	0.353619
Carcinoma, Renal Cell	hsa-mir-18a	0.353067
Colonic Neoplasms	hsa-mir-150	0.352164
Breast Neoplasms	hsa-mir-192	0.352162
Adrenocortical Carcinoma	hsa-mir-21	0.352099
Medulloblastoma	hsa-mir-137	0.352029
Lymphoma, Mantle-Cell	hsa-mir-155	0.3519
Carcinoma, Non-Small-Cell Lung	hsa-mir-181b	0.351197
Colonic Neoplasms	hsa-mir-146b	0.351077
Melanoma	hsa-mir-101	0.351064
Colorectal Neoplasms	hsa-mir-30c	0.349613
Stomach Neoplasms	hsa-mir-338	0.348329
Prostatic Neoplasms	hsa-let-7g	0.348096
Colorectal Neoplasms	hsa-mir-29b	0.34745
Breast Neoplasms	hsa-mir-15b	0.346959
Colonic Neoplasms	hsa-mir-200a	0.346474
Carcinoma, Renal Cell	hsa-mir-1	0.345719
Colonic Neoplasms	hsa-mir-199a	0.34503
Carcinoma, Renal Cell	hsa-mir-20a	0.344313
Melanoma	hsa-mir-150	0.343957
Esophageal Neoplasms	hsa-mir-18a	0.343831
Uterine Cervical Neoplasms	hsa-mir-200c	0.343471
Colorectal Neoplasms	hsa-mir-153	0.343204
Carcinoma, Squamous Cell	hsa-mir-199b	0.343137
Glioblastoma	hsa-mir-135a	0.343032
Glioblastoma	hsa-mir-15b	0.341861
Prostatic Neoplasms	hsa-mir-199b	0.341812
Glioma	hsa-mir-153	0.341706
Toxoplasma	hsa-mir-92a	0.341012
Stomach Neoplasms	hsa-mir-339	0.339763
Carcinoma, Non-Small-Cell Lung	hsa-mir-20a	0.33952
Head and Neck Neoplasms	hsa-mir-126	0.339334
Stomach Neoplasms	hsa-mir-26a	0.33904
Colonic Neoplasms	hsa-mir-183	0.339029
Ovarian Neoplasms	hsa-mir-199b	0.338905
Breast Neoplasms	hsa-mir-32	0.338858
Glioblastoma	hsa-mir-24	0.338788
Prostatic Neoplasms	hsa-mir-29c	0.338563
Stomach Neoplasms	hsa-mir-133a	0.338411
Osteosarcoma	hsa-mir-155	0.338274
Carcinoma, Non-Small-Cell Lung	hsa-let-7i	0.338086
Uterine Cervical Neoplasms	hsa-mir-18a	0.337585
Carcinoma	hsa-mir-17	0.337317
Carcinoma, Squamous Cell	hsa-mir-200b	0.337244
Lymphoma	hsa-mir-34a	0.336822
Glioblastoma	hsa-mir-106b	0.336611
Lung Neoplasms	hsa-mir-520b	0.336541
Pancreatic Neoplasms	hsa-mir-9	0.336459
Colorectal Neoplasms	hsa-mir-451	0.336446
Carcinoma, Renal Cell	hsa-mir-194	0.335987
Glioblastoma	hsa-mir-135b	0.335982
Nasopharyngeal Neoplasms	hsa-mir-21	0.335966
Ovarian Neoplasms	hsa-mir-15a	0.335909
Glioblastoma	hsa-mir-29b	0.33552
Lung Neoplasms	hsa-mir-141	0.33519
Head and Neck Neoplasms	hsa-mir-222	0.334914
Esophageal Neoplasms	hsa-mir-16	0.334531
Neoplasms	hsa-mir-194	0.334213
Leukemia-Lymphoma, Adult T-Cell	hsa-mir-125b	0.333924
Glioblastoma	hsa-mir-18b	0.333737
Colorectal Neoplasms	hsa-mir-30d	0.333459
Colorectal Neoplasms	hsa-mir-98	0.332386
Leukemia, Myeloid, Acute	hsa-mir-21	0.332316
Adenocarcinoma	hsa-mir-106b	0.332292
Ovarian Neoplasms	hsa-mir-142	0.332209
Endometrial Neoplasms	hsa-mir-218	0.331747
Carcinoma, Hepatocellular	hsa-mir-194	0.330628
Prostatic Neoplasms	hsa-mir-192	0.330535
Leukemia, Myeloid, Acute	hsa-mir-125a	0.330533
Stomach Neoplasms	hsa-mir-28	0.330466
Glioblastoma	hsa-mir-92b	0.330288
Heart Failure	hsa-let-7i	0.329636
Stomach Neoplasms	hsa-mir-215	0.329108
Prostatic Neoplasms	hsa-mir-181a	0.328529
Colonic Neoplasms	hsa-mir-196a	0.328281
Lung Neoplasms	hsa-mir-429	0.327918
Ovarian Neoplasms	hsa-mir-132	0.327682
Urinary Bladder Neoplasms	hsa-mir-194	0.327462
Prostatic Neoplasms	hsa-mir-9	0.327442
Stomach Neoplasms	hsa-mir-98	0.326904
Lymphoma, Primary Effusion	hsa-mir-155	0.326573
Breast Neoplasms	hsa-mir-99b	0.32641
Prostatic Neoplasms	hsa-mir-142	0.32593
Urinary Bladder Neoplasms	hsa-mir-16	0.325703
Stomach Neoplasms	hsa-mir-452	0.325696
Azoospermia	hsa-mir-371	0.325479
Carcinoma, Renal Cell	hsa-mir-30a	0.325436
Glioblastoma	hsa-mir-223	0.324837
Leukemia, Myeloid, Acute	hsa-mir-29c	0.324556
Pancreatic Neoplasms	hsa-mir-30a	0.324214
Colonic Neoplasms	hsa-mir-203	0.323579
Neoplasms	hsa-mir-1	0.323465
Head and Neck Neoplasms	hsa-mir-146a	0.323
Melanoma	hsa-mir-199b	0.321786
Ovarian Neoplasms	hsa-mir-106a	0.321599
Urinary Bladder Neoplasms	hsa-mir-29a	0.321326
Myelodysplastic Syndromes	hsa-mir-126	0.321104
Colon Neoplasms	hsa-mir-143	0.320898
Vascular Diseases	hsa-mir-19b	0.320843
Stomach Neoplasms	hsa-mir-153	0.320466
Ovarian Neoplasms	hsa-mir-24	0.320094
Glioblastoma	hsa-mir-203	0.319953
Colorectal Neoplasms	hsa-mir-30e	0.319558
Carcinoma, Non-Small-Cell Lung	hsa-mir-29a	0.319537
Melanoma	hsa-mir-95	0.319213
Colonic Neoplasms	hsa-mir-181b	0.319141
Urinary Bladder Neoplasms	hsa-let-7a	0.31904
Carcinoma, Non-Small-Cell Lung	hsa-mir-142	0.318886
Lymphoma	hsa-mir-9	0.318758
Urinary Bladder Neoplasms	hsa-mir-106b	0.318732
Head and Neck Neoplasms	hsa-mir-92a	0.318152
Neoplasms	hsa-mir-107	0.318151
Prostatic Neoplasms	hsa-mir-24	0.318145
Glioblastoma	hsa-mir-127	0.318044
Stomach Neoplasms	hsa-mir-367	0.317552
Medulloblastoma	hsa-mir-146b	0.317118
Carcinoma, Hepatocellular	hsa-mir-27b	0.31695
Colonic Neoplasms	hsa-mir-210	0.316788
Osteosarcoma	hsa-mir-146a	0.316609
Esophageal Neoplasms	hsa-mir-17	0.316587
Melanoma	hsa-mir-130a	0.316394
Colorectal Neoplasms	hsa-mir-23b	0.315871
Glioma	hsa-mir-25	0.315801
Prostatic Neoplasms	hsa-mir-10b	0.315282
Waldenstrom Macroglobulinemia	hsa-mir-561	0.315128
Carcinoma, Renal Cell	hsa-mir-18b	0.315094
Esophageal Neoplasms	hsa-let-7e	0.314941
Colorectal Neoplasms	hsa-mir-204	0.314606
Head and Neck Neoplasms	hsa-mir-210	0.314424
Ovarian Neoplasms	hsa-mir-107	0.314177
Arthritis, Rheumatoid	hsa-mir-20a	0.314144
Prostatic Neoplasms	hsa-mir-449b	0.314127
Stomach Neoplasms	hsa-mir-151	0.314113
Ovarian Neoplasms	hsa-mir-181a	0.314107
Uterine Cervical Neoplasms	hsa-mir-1	0.314062
Glioblastoma	hsa-mir-199b	0.314055
Breast Neoplasms	hsa-mir-28	0.313969
Carcinoma, Hepatocellular	hsa-mir-196b	0.313725
Carcinoma, Renal Cell	hsa-mir-29a	0.313326
Carcinoma, Ehrlich Tumor	hsa-mir-200c	0.313206
Heart Failure	hsa-mir-34a	0.312666
Neoplasms	hsa-mir-30b	0.312577
Carcinoma, Non-Small-Cell Lung	hsa-mir-106b	0.312326
Pancreatic Neoplasms	hsa-mir-135a	0.312316
Carcinoma, Non-Small-Cell Lung	hsa-mir-191	0.312303
Colonic Neoplasms	hsa-mir-135b	0.312023
Glioblastoma	hsa-mir-335	0.311862
Uterine Cervical Neoplasms	hsa-mir-200b	0.311188
Carcinoma, Renal Cell	hsa-mir-22	0.310926
Carcinoma, Non-Small-Cell Lung	hsa-mir-30c	0.31066
Carcinoma, Squamous Cell	hsa-mir-200a	0.310514
Esophageal Neoplasms	hsa-mir-429	0.310292
Retinoblastoma	hsa-mir-145	0.310135
Melanoma	hsa-mir-135a	0.309717
Adenocarcinoma	hsa-mir-18a	0.309427
Urinary Bladder Neoplasms	hsa-mir-30d	0.30942
Carcinoma, Squamous Cell	hsa-let-7c	0.30923
Carcinoma, Non-Small-Cell Lung	hsa-mir-133a	0.308993
Hypertrophy, Left Ventricular	hsa-mir-1	0.308961
Inflammation	hsa-mir-29b	0.308437
Leukemia, Myeloid, Acute	hsa-mir-199a	0.308095
Neoplasms	hsa-mir-339	0.308001
Melanoma	hsa-mir-224	0.307638
Colorectal Neoplasms	hsa-mir-29c	0.306909
Colonic Neoplasms	hsa-mir-34c	0.30627
Lymphoma, B-Cell	hsa-mir-221	0.306242
Urinary Bladder Neoplasms	hsa-mir-204	0.305965
Carcinoma, Squamous Cell	hsa-mir-93	0.305948
Ovarian Neoplasms	hsa-mir-204	0.305425
Carcinoma, Renal Cell	hsa-mir-130a	0.30489
Carcinoma, Non-Small-Cell Lung	hsa-mir-224	0.304455
Urinary Bladder Neoplasms	hsa-mir-30c	0.30407
Glioblastoma	hsa-mir-126	0.303897
Neoplasms	hsa-mir-151	0.302954
Pancreatic Neoplasms	hsa-mir-30d	0.302931
Melanoma	hsa-mir-335	0.30267
Nephrosclerosis	hsa-mir-200c	0.302509
Glioma	hsa-mir-15a	0.302287
Colorectal Neoplasms	hsa-mir-452	0.302145
Ovarian Neoplasms	hsa-mir-372	0.301694
Precursor Cell Lymphoblastic Leukemia-Lymphoma	hsa-mir-20a	0.301682
Neoplasms	hsa-mir-196a	0.301522
Stomach Neoplasms	hsa-mir-10a	0.301298
Breast Neoplasms	hsa-mir-186	0.301158
Esophageal Neoplasms	hsa-mir-222	0.30099
Lymphoma, B-Cell	hsa-mir-125b	0.3009
Esophageal Neoplasms	hsa-mir-218	0.30086
Carcinoma, Non-Small-Cell Lung	hsa-mir-24	0.30049
Colon Neoplasms	hsa-mir-21	0.300442
Heart Failure	hsa-let-7g	0.300269
Carcinoma	hsa-mir-143	0.300229
Myocardial Infarction	hsa-mir-17	0.300133
Colonic Neoplasms	hsa-mir-135a	0.300007
Carcinoma, Renal Cell	hsa-mir-98	0.29994
Melanoma	hsa-mir-139	0.299505
Prostatic Neoplasms	hsa-mir-135a	0.299107
Leukemia, Lymphocytic, Chronic, B-Cell	hsa-mir-126	0.298973
Ovarian Neoplasms	hsa-mir-373	0.29884
Carcinoma, Squamous Cell	hsa-mir-224	0.298372
Leukemia	hsa-mir-145	0.298012
Heart Failure	hsa-mir-214	0.296017
Precursor Cell Lymphoblastic Leukemia-Lymphoma	hsa-mir-155	0.295777
Pancreatic Neoplasms	hsa-mir-29a	0.295761
Carcinoma, Hepatocellular	hsa-mir-28	0.295752
Glioma	hsa-mir-10a	0.295492
Carcinoma, Renal Cell	hsa-mir-222	0.295393
Osteosarcoma	hsa-mir-106b	0.295363
Carcinoma, Non-Small-Cell Lung	hsa-mir-22	0.295219
Carcinoma, Renal Cell	hsa-mir-133a	0.295084
Stomach Neoplasms	hsa-mir-99a	0.295015
Breast Neoplasms	hsa-mir-130b	0.294961
Carcinoma, Squamous Cell	hsa-mir-199a	0.294902
Urinary Bladder Neoplasms	hsa-let-7b	0.294899
Lupus Erythematosus, Systemic	hsa-mir-18a	0.294891
Neoplasms	hsa-mir-215	0.294505
Urinary Bladder Neoplasms	hsa-mir-106a	0.293894
Carcinoma, Non-Small-Cell Lung	hsa-mir-19b	0.293873
Osteosarcoma	hsa-mir-125a	0.293854
Ovarian Neoplasms	hsa-mir-181b	0.293849
Carcinoma, Squamous Cell	hsa-mir-92b	0.293712
Melanoma	hsa-mir-32	0.293702
Lung Neoplasms	hsa-mir-296	0.293583
Carcinoma, Non-Small-Cell Lung	hsa-mir-95	0.293222
Neoplasms	hsa-mir-32	0.293189
Esophageal Neoplasms	hsa-mir-221	0.292661
Carcinoma, Hepatocellular	hsa-mir-186	0.292256
Adenoviridae Infections	hsa-mir-19a	0.292158
Ovarian Neoplasms	hsa-mir-196b	0.292095
Carcinoma, Renal Cell	hsa-mir-223	0.291937
Lymphoma	hsa-mir-221	0.291541
Neoplasms	hsa-mir-153	0.291375
Endometrial Neoplasms	hsa-mir-203	0.291364
Leukemia, Myeloid, Acute	hsa-mir-146b	0.291206
Stomach Neoplasms	hsa-mir-219	0.291062
Esophageal Neoplasms	hsa-mir-199b	0.291033
Uterine Cervical Neoplasms	hsa-mir-429	0.290976
Arthritis, Rheumatoid	hsa-mir-17	0.290941
Esophageal Neoplasms	hsa-mir-133b	0.290867
Head and Neck Neoplasms	hsa-mir-22	0.290842
Glioblastoma	hsa-mir-383	0.290815
Carcinoma, Renal Cell	hsa-mir-221	0.290669
Ovarian Neoplasms	hsa-mir-196a	0.290603
Neuroblastoma	hsa-mir-125b	0.290538
Carcinoma, Hepatocellular	hsa-mir-137	0.290158
Head and Neck Neoplasms	hsa-mir-10b	0.29007
Prostatic Neoplasms	hsa-mir-372	0.290001
Carcinoma	hsa-mir-210	0.289885
Carcinoma, Non-Small-Cell Lung	hsa-mir-127	0.289775
Carcinoma, Hepatocellular	hsa-mir-302a	0.28961
Lung Neoplasms	hsa-mir-15b	0.289444
Prostatic Neoplasms	hsa-mir-20b	0.289302
Gastrointestinal Neoplasms	hsa-mir-21	0.289242
Colorectal Neoplasms	hsa-mir-30b	0.289241
Urinary Bladder Neoplasms	hsa-mir-191	0.289105
Glioma	hsa-mir-497	0.288961
Breast Neoplasms	hsa-mir-95	0.288932
Leukemia, Lymphocytic, Chronic, B-Cell	hsa-mir-142	0.288929
Esophageal Neoplasms	hsa-mir-125a	0.288701
Gastrointestinal Neoplasms	hsa-let-7b	0.2887
Eosinophilic Esophagitis	hsa-mir-155	0.28844
Glioma	hsa-mir-339	0.288379
Pancreatic Neoplasms	hsa-mir-18b	0.288332
Prostatic Neoplasms	hsa-mir-150	0.288065
Lung Neoplasms	hsa-mir-451	0.287959
Carcinoma, Renal Cell	hsa-mir-29b	0.287929
Colonic Neoplasms	hsa-mir-148a	0.287907
Carcinoma, Renal Cell	hsa-mir-25	0.287858
Osteosarcoma	hsa-mir-126	0.287519
Adenocarcinoma	hsa-mir-222	0.287208
Lymphoma, B-Cell	hsa-mir-223	0.287073
Carcinoma	hsa-mir-126	0.287019
Neoplasms	hsa-mir-181d	0.286969
Digestive System Neoplasms	hsa-mir-221	0.286481
Vascular Diseases	hsa-mir-92a	0.286365
Prostatic Neoplasms	hsa-mir-7	0.286128
Atherosclerosis	hsa-mir-1	0.286084
Ovarian Neoplasms	hsa-mir-206	0.285895
Endometrial Neoplasms	hsa-mir-145	0.285882
Colonic Neoplasms	hsa-mir-29c	0.285737
Urinary Bladder Neoplasms	hsa-mir-135a	0.285608
Lymphoma, B-Cell	hsa-mir-24	0.285435
Retinoblastoma	hsa-mir-9	0.285167
Mouth Neoplasms	hsa-mir-200b	0.285117
Glioma	hsa-mir-203	0.285083
Ovarian Neoplasms	hsa-mir-195	0.284972
Glioblastoma	hsa-mir-124	0.284708
Carcinoma, Hepatocellular	hsa-mir-340	0.284437
Colonic Neoplasms	hsa-mir-195	0.284166
Carcinoma	hsa-mir-181b	0.284076
Adenocarcinoma	hsa-mir-214	0.283919
Heart Failure	hsa-mir-30d	0.283867
Carcinoma, Hepatocellular	hsa-mir-658	0.283853
Medulloblastoma	hsa-mir-335	0.283768
Melanoma	hsa-mir-98	0.28366
Carcinoma, Hepatocellular	hsa-mir-339	0.283602
Colorectal Neoplasms	hsa-mir-196b	0.283585
Uterine Cervical Neoplasms	hsa-mir-146b	0.283028
Glioblastoma	hsa-mir-200c	0.282757
Urinary Bladder Neoplasms	hsa-mir-23b	0.2826
Neoplasms	hsa-mir-203	0.282565
Melanoma	hsa-mir-196b	0.282478
Ovarian Neoplasms	hsa-mir-15b	0.282406
Carcinoma, Squamous Cell	hsa-mir-23b	0.282389
Mesothelioma	hsa-mir-145	0.282326
Muscular Disorders, Atrophic	hsa-mir-1	0.281969
Glioblastoma	hsa-mir-214	0.281785
Carcinoma, Hepatocellular	hsa-mir-451	0.281713
Muscular Dystrophy, Facioscapulohumeral	hsa-mir-206	0.281595
Colorectal Neoplasms	hsa-mir-376c	0.281483
Colon Neoplasms	hsa-mir-155	0.281013
Asthma	hsa-mir-222	0.280795
Urinary Bladder Neoplasms	hsa-mir-20b	0.280771
Medulloblastoma	hsa-mir-101	0.280771
Arthritis, Rheumatoid	hsa-mir-92a	0.280282
Neoplasms	hsa-mir-296	0.279158
Esophageal Neoplasms	hsa-mir-19b	0.278973
Carcinoma, Non-Small-Cell Lung	hsa-mir-92a	0.278609
Uterine Cervical Neoplasms	hsa-mir-92a	0.278587
Carcinoma	hsa-mir-218	0.278523
Carcinoma, Non-Small-Cell Lung	hsa-mir-18b	0.278388
Melanoma	hsa-mir-373	0.27809
Breast Neoplasms	hsa-mir-196b	0.277518
Colonic Neoplasms	hsa-mir-34b	0.277351
Ovarian Neoplasms	hsa-mir-135a	0.277271
Carcinoma, Renal Cell	hsa-mir-20b	0.277244
Urinary Bladder Neoplasms	hsa-mir-214	0.277104
Pancreatic Neoplasms	hsa-mir-93	0.2771
Glioblastoma	hsa-mir-34c	0.276946
Pancreatic Neoplasms	hsa-mir-451	0.276879
Glioblastoma	hsa-let-7b	0.276857
Carcinoma, Hepatocellular	hsa-mir-376c	0.276841
Stomach Neoplasms	hsa-mir-23a	0.276831
Glioblastoma	hsa-mir-150	0.276612
Colorectal Neoplasms	hsa-mir-99b	0.276477
Melanoma	hsa-mir-27a	0.276427
Head and Neck Neoplasms	hsa-mir-127	0.276309
Rectal Neoplasms	hsa-mir-126	0.276168
Carcinoma, Squamous Cell	hsa-let-7e	0.276157
Carcinoma, Squamous Cell	hsa-mir-26a	0.276144
Kidney Neoplasms	hsa-mir-200a	0.27603
Colorectal Neoplasms	hsa-mir-520b	0.275968
Carcinoma, Renal Cell	hsa-mir-214	0.27577
Uterine Cervical Neoplasms	hsa-mir-141	0.275625
Endometrial Neoplasms	hsa-mir-126	0.275169
Urinary Bladder Neoplasms	hsa-mir-181a	0.27502
Retinoblastoma	hsa-mir-125b	0.274847
Osteosarcoma	hsa-mir-29c	0.274665
Glioblastoma	hsa-mir-196a	0.274293
Melanoma	hsa-mir-100	0.27424
Prostatic Neoplasms	hsa-mir-151	0.273888
Carcinoma, Renal Cell	hsa-mir-30b	0.273653
Head and Neck Neoplasms	hsa-mir-20a	0.27361
Heart Failure	hsa-mir-15a	0.27326
Medulloblastoma	hsa-mir-367	0.273098
Colorectal Neoplasms	hsa-mir-302a	0.27291
Leukemia, Myeloid, Acute	hsa-mir-191	0.272691
Leukemia, lymphoblastic, Acute	hsa-mir-125b	0.272523
Carcinoma, Squamous Cell	hsa-mir-135a	0.272477
Carcinoma, Renal Cell	hsa-mir-92b	0.2723
Lupus Erythematosus, Systemic	hsa-mir-223	0.272297
Prostatic Neoplasms	hsa-mir-215	0.272281
Esophageal Neoplasms	hsa-mir-195	0.272247
Carcinoma, Basal Cell	hsa-mir-20a	0.271992
Glioblastoma	hsa-let-7c	0.271987
Head and Neck Neoplasms	hsa-mir-183	0.271749
Colonic Neoplasms	hsa-mir-92b	0.271516
Glioma	hsa-mir-125a	0.271386
Adenocarcinoma	hsa-mir-101	0.271055
Colonic Neoplasms	hsa-mir-181a	0.271053
Esophageal Neoplasms	hsa-let-7i	0.270909
Mesothelioma	hsa-mir-34a	0.270855
Breast Neoplasms	hsa-mir-212	0.270586
Hodgkin Disease	hsa-mir-15a	0.270583
Adrenocortical Adenoma	hsa-mir-100	0.270528
Carcinoma, Squamous Cell	hsa-mir-451	0.270393
Lupus Erythematosus, Systemic	hsa-mir-19a	0.270377
Stomach Neoplasms	hsa-mir-491	0.27028
Thyroid Neoplasms	hsa-mir-203	0.269848
Carcinoma, Hepatocellular	hsa-mir-452	0.269847
Prostatic Neoplasms	hsa-mir-95	0.269767
Urinary Bladder Neoplasms	hsa-let-7d	0.26975
Adenocarcinoma	hsa-mir-375	0.26965
Esophageal Neoplasms	hsa-mir-107	0.269625
Leukemia, Myeloid, Acute	hsa-mir-200b	0.269534
Melanoma	hsa-mir-10a	0.269376
Stomach Neoplasms	hsa-mir-148a	0.26935
Glioblastoma	hsa-let-7f	0.26917
Osteosarcoma	hsa-let-7a	0.26916
Uterine Cervical Neoplasms	hsa-mir-199a	0.269121
Adenocarcinoma	hsa-mir-19b	0.268802
Glioma	hsa-mir-146a	0.268456
Melanoma	hsa-mir-206	0.268345
Pancreatic Neoplasms	hsa-mir-181a	0.268252
Carcinoma, Hepatocellular	hsa-mir-449a	0.268222
Ovarian Neoplasms	hsa-mir-10a	0.267895
Urinary Bladder Neoplasms	hsa-mir-150	0.267826
Esophageal Neoplasms	hsa-mir-194	0.267802
Melanoma	hsa-mir-497	0.267644
Glioma	hsa-mir-155	0.267631
Stomach Neoplasms	hsa-mir-181d	0.26758
Carcinoma, Squamous Cell	hsa-mir-25	0.267561
Atrial Fibrillation	hsa-mir-1	0.267516
Retinoblastoma	hsa-mir-221	0.267431
Breast Neoplasms	hsa-mir-449b	0.267387
Endometriosis	hsa-mir-155	0.267305
Melanoma	hsa-mir-99b	0.266921
Lymphoma	hsa-mir-195	0.266904
Breast Neoplasms	hsa-mir-99a	0.266843
Carcinoma, Squamous Cell	hsa-mir-132	0.266661
Leukemia, Myeloid, Acute	hsa-mir-101	0.266571
Carcinoma, Non-Small-Cell Lung	hsa-mir-31	0.266553
Leukemia	hsa-mir-155	0.266482
Neoplasms	hsa-mir-183	0.266392
Medulloblastoma	hsa-mir-200b	0.266124
Carcinoma, Non-Small-Cell Lung	hsa-mir-141	0.266012
Endometrial Neoplasms	hsa-mir-34c	0.265908
Pancreatic Neoplasms	hsa-mir-27b	0.265728
Esophageal Neoplasms	hsa-mir-30a	0.265617
Glioma	hsa-mir-372	0.265177
Esophageal Neoplasms	hsa-let-7d	0.26494
Glioblastoma	hsa-mir-30e	0.264648
Precursor Cell Lymphoblastic Leukemia-Lymphoma	hsa-mir-142	0.264639
Toxoplasmosis	hsa-mir-19a	0.2646
Pancreatic Neoplasms	hsa-mir-219	0.264504
Urinary Bladder Neoplasms	hsa-mir-18b	0.264305
Carcinoma, Hepatocellular	hsa-mir-193b	0.264237
Urinary Bladder Neoplasms	hsa-mir-132	0.263948
Cardiomegaly	hsa-mir-21	0.263852
Neoplasms	hsa-mir-383	0.263851
Carcinoma, Non-Small-Cell Lung	hsa-mir-192	0.26383
Atherosclerosis	hsa-mir-20a	0.263774
Nasopharyngeal Neoplasms	hsa-mir-19a	0.263354
Carcinoma, Renal Cell	hsa-mir-15b	0.263159
Carcinoma, Hepatocellular	hsa-mir-424	0.263062
Carcinoma, Hepatocellular	hsa-mir-663	0.262925
Carcinoma, Hepatocellular	hsa-mir-206	0.262881
Colonic Neoplasms	hsa-mir-133a	0.262811
Colorectal Neoplasms	hsa-mir-151	0.262804
Carcinoma, Hepatocellular	hsa-mir-299	0.262744
Lymphoma, T-Cell	hsa-mir-16	0.2626
Adrenal Cortex Neoplasms	hsa-mir-130a	0.262498
Heart Failure	hsa-mir-125b	0.262447
Digestive System Neoplasms	hsa-mir-222	0.262405
Prostatic Neoplasms	hsa-mir-30a	0.262321
Glioma	hsa-mir-148a	0.262243
Carcinoma, Squamous Cell	hsa-mir-191	0.262217
Carcinoma, Renal Cell	hsa-mir-183	0.262203
Carcinoma, Renal Cell	hsa-mir-135b	0.262163
Cholangiocarcinoma	hsa-mir-200a	0.261979
Gastrointestinal Neoplasms	hsa-mir-155	0.261941
Gastrointestinal Neoplasms	hsa-mir-145	0.261802
Esophageal Neoplasms	hsa-mir-30c	0.261531
Leukemia	hsa-mir-126	0.26151
Esophageal Neoplasms	hsa-mir-127	0.261234
Carcinoma, Squamous Cell	hsa-mir-192	0.261107
Myelodysplastic Syndromes	hsa-mir-18a	0.26098
Carcinoma, Renal Cell	hsa-mir-191	0.260844
Ovarian Neoplasms	hsa-mir-98	0.260378
Glioma	hsa-mir-29a	0.260247
Neoplasms	hsa-mir-100	0.260191
Breast Neoplasms	hsa-mir-449a	0.260002
Carcinoma, Renal Cell	hsa-mir-30e	0.259944
Retinoblastoma	hsa-mir-31	0.259722
Adrenocortical Carcinoma	hsa-mir-99b	0.259707
Thyroid Neoplasms	hsa-mir-145	0.259699
Carcinoma, Squamous Cell	hsa-mir-196a	0.259636
Nasopharyngeal Neoplasms	hsa-mir-34a	0.259588
Gastrointestinal Neoplasms	hsa-mir-486	0.259364
Leukemia, Myeloid, Acute	hsa-mir-32	0.259283
Glioma	hsa-let-7d	0.259229
Lupus Erythematosus, Systemic	hsa-mir-16	0.259186
Carcinoma, Squamous Cell	hsa-mir-139	0.259184
Uterine Cervical Neoplasms	hsa-let-7a	0.259138
Multiple Myeloma	hsa-mir-146a	0.259009
Oligodendroglioma	hsa-mir-124	0.25897
Colon Neoplasms	hsa-mir-20a	0.258825
Neoplasms	hsa-mir-133a	0.258749
Osteosarcoma	hsa-mir-146b	0.25857
Glioblastoma	hsa-mir-107	0.258224
Brain Ischemia	hsa-mir-124	0.258018
Medulloblastoma	hsa-mir-302c	0.258013
Stomach Neoplasms	hsa-mir-96	0.257885
Cardiomegaly	hsa-mir-133b	0.25783
Carcinoma, Squamous Cell	hsa-mir-141	0.257694
Adenocarcinoma	hsa-mir-34c	0.257668
Urinary Bladder Neoplasms	hsa-mir-92b	0.257578
Esophageal Neoplasms	hsa-mir-10b	0.257553
Head and Neck Neoplasms	hsa-mir-19a	0.257314
Medulloblastoma	hsa-mir-302a	0.257259
Lymphoma	hsa-mir-145	0.257082
Carcinoma, Small Cell	hsa-mir-126	0.257054
Carcinoma, Renal Cell	hsa-mir-181b	0.256937
Head and Neck Neoplasms	hsa-mir-17	0.25689
Carcinoma, Renal Cell	hsa-mir-24	0.256816
Carcinoma, Renal Cell	hsa-mir-10a	0.256765
Stomach Neoplasms	hsa-mir-383	0.256658
Thyroid Neoplasms	hsa-mir-34c	0.256654
Head and Neck Neoplasms	hsa-mir-16	0.256629
Breast Neoplasms	hsa-mir-198	0.256604
Carcinoma	hsa-mir-92a	0.256463
Carcinoma, Non-Small-Cell Lung	hsa-mir-19a	0.256406
Carcinoma, Non-Small-Cell Lung	hsa-mir-25	0.256373
Thyroid Neoplasms	hsa-mir-34a	0.256252
Glioblastoma	hsa-mir-181b	0.256218
Carcinoma, Squamous Cell	hsa-mir-181c	0.256208
Astrocytoma	hsa-mir-31	0.256187
Leukemia, lymphoblastic, Chronic	hsa-mir-125b	0.255992
Carcinoma, Hepatocellular	hsa-mir-151	0.255751
Liver Neoplasms	hsa-mir-200c	0.255699
Coronary Artery Disease	hsa-mir-133a	0.255297
Heart Failure	hsa-mir-9	0.255183
Stomach Neoplasms	hsa-mir-424	0.255095
Glioblastoma	hsa-mir-191	0.254976
Crohn Disease	hsa-mir-155	0.254916
Osteosarcoma	hsa-mir-34b	0.254792
Glioblastoma	hsa-mir-96	0.25474
Prostatic Neoplasms	hsa-mir-92b	0.254663
Carcinoma, Hepatocellular	hsa-mir-184	0.254608
Pancreatic Neoplasms	hsa-mir-195	0.254601
Glioblastoma	hsa-mir-30d	0.254273
Lymphoma	hsa-let-7a	0.254192
Uterine Cervical Neoplasms	hsa-mir-106b	0.254181
Glioblastoma	hsa-mir-204	0.254172
Esophageal Neoplasms	hsa-mir-18b	0.25407
Urinary Bladder Neoplasms	hsa-let-7c	0.253939
Inflammation	hsa-mir-15a	0.253784
Heart Failure	hsa-mir-191	0.253774
Lung Neoplasms	hsa-mir-194	0.253629
Glioma	hsa-mir-29b	0.253582
Pancreatic Neoplasms	hsa-mir-98	0.253525
Glioblastoma	hsa-mir-34b	0.253439
Thyroid Neoplasms	hsa-mir-99a	0.253438
Ovarian Neoplasms	hsa-mir-23b	0.253403
Carcinoma, Renal Cell	hsa-mir-182	0.253222
Carcinoma, Non-Small-Cell Lung	hsa-mir-18a	0.253193
Lupus Erythematosus, Systemic	hsa-mir-29a	0.253073
Carcinoma, Basal Cell	hsa-mir-92a	0.252953
Osteosarcoma	hsa-mir-145	0.252935
Stomach Neoplasms	hsa-mir-299	0.252813
Glioblastoma	hsa-mir-200a	0.252798
Sarcoma, Ewing's	hsa-mir-21	0.252674
Adenocarcinoma	hsa-mir-151	0.252593
Carcinoma, Renal Cell	hsa-mir-196b	0.252269
Colonic Neoplasms	hsa-mir-25	0.252252
Colorectal Neoplasms	hsa-mir-424	0.252189
Nasopharyngeal Neoplasms	hsa-mir-19b	0.252106
Endometrial Neoplasms	hsa-mir-143	0.25204
Endometrial Neoplasms	hsa-mir-221	0.251863
Carcinoma, Non-Small-Cell Lung	hsa-mir-451	0.251638
Prostatic Neoplasms	hsa-mir-139	0.251588
Colorectal Neoplasms	hsa-mir-197	0.251425
Gastrointestinal Neoplasms	hsa-let-7f	0.251356
Melanoma	hsa-mir-192	0.251285
Thyroid Neoplasms	hsa-let-7a	0.251163
Pancreatic Neoplasms	hsa-mir-33a	0.251043
Biliary Tract Neoplasms	hsa-let-7g	0.251006
Pancreatic Neoplasms	hsa-mir-181c	0.25081
Stomach Neoplasms	hsa-mir-488	0.250805
Glioblastoma	hsa-let-7e	0.250662
Cervical Neoplasms	hsa-mir-21	0.250658
Glioblastoma	hsa-mir-141	0.250503
Myelodysplastic Syndromes	hsa-mir-19b	0.250384
Carcinoma, Hepatocellular	hsa-mir-215	0.25036
Lung Neoplasms	hsa-mir-28	0.250305
Leukemia	hsa-mir-181b	0.250298
Liver Diseases, Alcoholic	hsa-mir-122	0.250264
Adenoviridae Infections	hsa-mir-20a	0.250264
Colonic Neoplasms	hsa-mir-26a	0.249674
Stomach Neoplasms	hsa-mir-301b	0.249562
Carcinoma	hsa-mir-18a	0.249391
Carcinoma, Squamous Cell	hsa-mir-206	0.249344
Carcinoma, Hepatocellular	hsa-mir-26b	0.249302
Glioblastoma	hsa-let-7i	0.249261
Pancreatic Neoplasms	hsa-mir-106b	0.249246
Digestive System Neoplasms	hsa-mir-98	0.24923
Lung Neoplasms	hsa-mir-139	0.249154
Urinary Bladder Neoplasms	hsa-mir-451	0.248934
Colorectal Neoplasms	hsa-mir-629	0.248338
Fatty Liver	hsa-mir-122	0.248314
Kidney Neoplasms	hsa-mir-200b	0.248191
Gastrointestinal Neoplasms	hsa-let-7c	0.248155
Colorectal Neoplasms	hsa-mir-193b	0.247993
Neuroblastoma	hsa-mir-16	0.247992
Glioma	hsa-let-7a	0.247954
Medulloblastoma	hsa-mir-210	0.247887
Lupus Erythematosus, Systemic	hsa-mir-203	0.247646
Stomach Neoplasms	hsa-mir-370	0.247529
Glioma	hsa-mir-127	0.247496
Lung Neoplasms	hsa-mir-23b	0.247259
Uterine Cervical Neoplasms	hsa-mir-148a	0.246931
Endometrial Neoplasms	hsa-mir-133b	0.246704
Colon Neoplasms	hsa-mir-630	0.246431
Esophageal Neoplasms	hsa-mir-29a	0.246422
Carcinoma, Hepatocellular	hsa-mir-494	0.246079
Mouth Neoplasms	hsa-let-7a	0.246076
Osteosarcoma	hsa-mir-31	0.245895
Lung Neoplasms	hsa-mir-193b	0.245882
Mesothelioma	hsa-mir-29b	0.24588
Head and Neck Neoplasms	hsa-mir-19b	0.245763
Glioblastoma	hsa-mir-93	0.245697
Colon Neoplasms	hsa-mir-125b	0.245679
Carcinoma, Non-Small-Cell Lung	hsa-mir-26a	0.245551
Waldenstrom Macroglobulinemia	hsa-mir-21	0.245328
Carcinoma, Non-Small-Cell Lung	hsa-mir-23b	0.245296
Colonic Neoplasms	hsa-mir-214	0.245296
Colorectal Neoplasms	hsa-mir-10a	0.244955
Glioma	hsa-mir-338	0.244884
Prostate Neoplasms	hsa-mir-96	0.244877
Carcinoma, Squamous Cell	hsa-mir-7	0.244841
Multiple Myeloma	hsa-mir-542	0.244732
Thyroid Neoplasms	hsa-mir-223	0.244686
Colonic Neoplasms	hsa-mir-15b	0.244237
Multiple Myeloma	hsa-mir-494	0.244057
Carcinoma, Non-Small-Cell Lung	hsa-mir-30b	0.243996
Heart Failure	hsa-mir-29c	0.243935
Lymphoma, B-Cell	hsa-mir-126	0.243907
Stomach Neoplasms	hsa-mir-198	0.243853
Thyroid Neoplasms	hsa-let-7b	0.243417
Lymphoma, B-Cell	hsa-mir-26a	0.243398
Glioblastoma	hsa-mir-133a	0.243248
Medulloblastoma	hsa-mir-221	0.243088
Glioblastoma	hsa-mir-132	0.242865
Carcinoma, Non-Small-Cell Lung	hsa-mir-139	0.24286
Breast Neoplasms	hsa-mir-421	0.242748
Multiple Myeloma	hsa-mir-9	0.242678
Breast Neoplasms	hsa-mir-337	0.242579
Prostatic Neoplasms	hsa-mir-302b	0.24251
Ovarian Neoplasms	hsa-mir-520b	0.242415
Leukemia, lymphoblastic, Acute	hsa-mir-223	0.242221
Heart Failure	hsa-mir-146a	0.242208
Endometriosis	hsa-mir-19b	0.242194
Carcinoma, Hepatocellular	hsa-mir-216b	0.241977
Hematologic Neoplasms	hsa-mir-21	0.241866
Head and Neck Neoplasms	hsa-mir-218	0.241624
Lymphoma, B-Cell	hsa-mir-20b	0.241553
Colorectal Neoplasms	hsa-mir-32	0.241517
Bladder Neoplasms	hsa-mir-378a	0.241458
Lymphoproliferative Disorders	hsa-mir-155	0.241352
Stomach Neoplasms	hsa-mir-542	0.24134
Colorectal Neoplasms	hsa-mir-130b	0.241296
Head and Neck Neoplasms	hsa-mir-34c	0.241165
Adenocarcinoma	hsa-mir-1	0.24093
Lung Neoplasms	hsa-mir-10a	0.240897
Carcinoma	hsa-mir-106a	0.240687
Carcinoma, Hepatocellular	hsa-mir-185	0.240518
Endometrial Neoplasms	hsa-mir-99b	0.240406
Thyroid Neoplasms	hsa-mir-101	0.240283
Glioblastoma	hsa-mir-451	0.240265
Myelodysplastic Syndromes	hsa-mir-146b	0.240022
Stomach Neoplasms	hsa-mir-451a	0.239996
Long QT Syndrome	hsa-mir-1	0.239991
Pancreatic Neoplasms	hsa-mir-33b	0.239963
Glioblastoma	hsa-mir-193b	0.239943
Head and Neck Neoplasms	hsa-mir-99b	0.239936
Ovarian Neoplasms	hsa-mir-26a	0.239899
Melanoma	hsa-mir-372	0.239888
Glioma	hsa-mir-126	0.239864
Carcinoma, Squamous Cell	hsa-mir-658	0.239843
Prostatic Neoplasms	hsa-mir-30b	0.239769
Carcinoma, Non-Small-Cell Lung	hsa-mir-204	0.239614
Esophageal Neoplasms	hsa-let-7f	0.239385
Bladder Neoplasms	hsa-mir-378b	0.239364
Bladder Neoplasms	hsa-mir-378c	0.239364
Bladder Neoplasms	hsa-mir-378d	0.239364
Bladder Neoplasms	hsa-mir-378e	0.239364
Bladder Neoplasms	hsa-mir-378f	0.239364
Bladder Neoplasms	hsa-mir-378g	0.239364
Bladder Neoplasms	hsa-mir-378h	0.239364
Bladder Neoplasms	hsa-mir-378i	0.239364
Ovarian Neoplasms	hsa-mir-150	0.239327
Endometriosis	hsa-mir-98	0.239263
Precursor Cell Lymphoblastic Leukemia-Lymphoma	hsa-mir-16	0.239211
Carcinoma, Squamous Cell	hsa-mir-29b	0.239183
Mouth Neoplasms	hsa-mir-155	0.239082
Glioblastoma	hsa-mir-219	0.238984
Medulloblastoma	hsa-mir-151	0.238909
Glioblastoma	hsa-mir-373	0.238876
Hepatitis B	hsa-mir-20a	0.238816
Heart Failure	hsa-mir-141	0.238686
Esophageal Neoplasms	hsa-mir-146b	0.238685
Carcinoma, Non-Small-Cell Lung	hsa-mir-20b	0.238682
Adenocarcinoma	hsa-mir-10a	0.238546
Glioblastoma	hsa-mir-504	0.238374
Urinary Bladder Neoplasms	hsa-let-7e	0.238228
Colonic Neoplasms	hsa-mir-429	0.238199
Glioma	hsa-mir-34b	0.238098
Glioma	hsa-mir-191	0.238048
Carcinoma	hsa-mir-19b	0.23803
Retinoblastoma	hsa-mir-146b	0.237942
Colorectal Neoplasms	hsa-mir-449a	0.237918
Carcinoma, Non-Small-Cell Lung	hsa-mir-28	0.237846
Uterine Cervical Neoplasms	hsa-mir-125a	0.237836
Ependymoma	hsa-mir-21	0.237729
Lymphoma	hsa-mir-224	0.237616
Ovarian Neoplasms	hsa-mir-27b	0.23731
Prostatic Neoplasms	hsa-mir-137	0.237186
Glioblastoma	hsa-mir-149	0.237022
Carcinoma, Non-Small-Cell Lung	hsa-mir-206	0.236874
Schizophrenia	hsa-mir-146a	0.236809
Myocardial Infarction	hsa-mir-146a	0.236682
Bladder Neoplasms	hsa-mir-21	0.236653
Sezary Syndrome	hsa-mir-155	0.2366
Digestive System Neoplasms	hsa-mir-375	0.23653
Hepatitis B	hsa-mir-222	0.236439
Carcinoma, Hepatocellular	hsa-mir-342	0.236433
Colonic Neoplasms	hsa-mir-199b	0.236426
Neuroblastoma	hsa-mir-20b	0.236382
Adenocarcinoma	hsa-mir-100	0.236369
Carcinoma, Renal Cell	hsa-mir-212	0.236348
Lupus Erythematosus, Systemic	hsa-mir-92a	0.236282
Colorectal Neoplasms	hsa-mir-302c	0.23626
Colorectal Neoplasms	hsa-mir-494	0.23608
Stomach Neoplasms	hsa-mir-510	0.235907
Glioblastoma	hsa-mir-137	0.235825
Prostate Neoplasms	hsa-mir-486	0.235765
Hypertrophy	hsa-mir-222	0.235696
Heart Failure	hsa-mir-20b	0.235602
Esophageal Neoplasms	hsa-mir-7	0.235524
Adrenocortical Carcinoma	hsa-let-7e	0.235364
Carcinoma	hsa-mir-141	0.235141
Glioma	hsa-mir-34c	0.235061
Waldenstrom Macroglobulinemia	hsa-mir-342	0.235034
Pancreatic Neoplasms	hsa-mir-30b	0.235023
Ependymoma	hsa-mir-124	0.234792
Uterine Cervical Neoplasms	hsa-let-7b	0.234656
Prostate Neoplasms	hsa-mir-100	0.234652
Glioblastoma	hsa-mir-363	0.234611
Adrenocortical Carcinoma	hsa-mir-200a	0.23451
Hepatitis B	hsa-mir-29b	0.234469
Lymphoma	hsa-mir-183	0.234446
Colonic Neoplasms	hsa-mir-30d	0.23444
Uterine Cervical Neoplasms	hsa-mir-199b	0.234124
Carcinoma, Renal Cell	hsa-mir-151	0.234048
Esophageal Neoplasms	hsa-mir-497	0.233724
Astrocytoma	hsa-mir-34a	0.233693
Glioblastoma	hsa-mir-338	0.233489
Inflammation	hsa-mir-146b	0.233308
Bladder Neoplasms	hsa-mir-138	0.233299
Retinoblastoma	hsa-mir-135a	0.233111
Carcinoma, Squamous Cell	hsa-mir-135b	0.232941
Glioblastoma	hsa-mir-1	0.232877
Glioblastoma	hsa-mir-323a	0.232578
Breast Neoplasms	hsa-mir-491	0.232565
Urinary Bladder Neoplasms	hsa-mir-124	0.232338
Reperfusion Injury	hsa-mir-155	0.232231
Bladder Neoplasms	hsa-mir-574	0.23216
Carcinoma, Renal Cell	hsa-mir-140	0.232089
Glioblastoma	hsa-mir-326	0.232088
Endometriosis	hsa-mir-21	0.231969
Glioblastoma	hsa-let-7g	0.231894
Oligodendroglioma	hsa-mir-21	0.231874
Leukemia, Myeloid, Acute	hsa-mir-18b	0.231844
Leukemia, lymphoblastic, Chronic	hsa-mir-16	0.231817
Lung Neoplasms	hsa-mir-302b	0.231789
Hepatitis B	hsa-mir-21	0.231638
Adrenal Cortex Neoplasms	hsa-mir-483	0.231611
Glioblastoma	hsa-mir-197	0.231569
Leukemia, Myeloid, Acute	hsa-mir-451	0.23152
Atherosclerosis	hsa-mir-223	0.231504
Adrenocortical Carcinoma	hsa-mir-223	0.231216
Inflammation	hsa-mir-223	0.231176
Adenocarcinoma	hsa-mir-146a	0.231145
Carcinoma, Squamous Cell	hsa-let-7b	0.230962
Melanoma	hsa-mir-133b	0.230781
Liver Cirrhosis	hsa-mir-122	0.230603
Prostatic Neoplasms	hsa-mir-302c	0.23036
Precursor Cell Lymphoblastic Leukemia-Lymphoma	hsa-mir-21	0.230293
Prostate Neoplasms	hsa-mir-708	0.230115
Heart Failure	hsa-mir-143	0.230094
Hepatitis B	hsa-mir-17	0.230032
Gastric Neoplasms	hsa-mir-451a	0.229826
Uterine Cervical Neoplasms	hsa-mir-204	0.229726
Endometrial Neoplasms	hsa-mir-125a	0.229537
Cardiomyopathy, Dilated	hsa-mir-133a	0.22945
Colon Neoplasms	hsa-mir-16	0.229406
Endometriosis	hsa-mir-18a	0.229385
Cervical Neoplasms	hsa-mir-125b	0.229217
Diabetic Nephropathies	hsa-mir-141	0.229109
Neoplasms	hsa-mir-192	0.229104
Breast Neoplasms	hsa-mir-185	0.229062
Urinary Bladder Neoplasms	hsa-mir-206	0.22897
Mesothelioma	hsa-mir-191	0.228914
Colon Neoplasms	hsa-mir-31	0.228808
Osteosarcoma	hsa-mir-222	0.228722
Hepatitis B	hsa-mir-199a	0.228485
Prostate Neoplasms	hsa-mir-182	0.228422
Uterine Cervical Neoplasms	hsa-mir-210	0.228391
Choriocarcinoma	hsa-mir-21	0.228303
Heart Failure	hsa-mir-101	0.228173
Heart Failure	hsa-mir-222	0.228102
Retinoblastoma	hsa-mir-181a	0.228046
Cervical Neoplasms	hsa-mir-27a	0.22799
Mouth Neoplasms	hsa-mir-146a	0.22792
Lymphoma	hsa-mir-142	0.227916
Carcinoma, Hepatocellular	hsa-mir-367	0.227865
Cervical Neoplasms	hsa-mir-100	0.227714
Colorectal Neoplasms	hsa-mir-421	0.22748
Mouth Neoplasms	hsa-mir-100	0.227439
Esophageal Neoplasms	hsa-mir-191	0.227378
Prostatic Neoplasms	hsa-mir-424	0.227018
Glioblastoma	hsa-mir-221	0.226993
Myelodysplastic Syndromes	hsa-mir-150	0.226754
Arrhythmias, Cardiac	hsa-mir-21	0.226735
Adenocarcinoma	hsa-mir-127	0.226491
Pancreatic Neoplasms	hsa-mir-7	0.22642
Endometrial Neoplasms	hsa-mir-146a	0.226414
Carcinoma	hsa-mir-146a	0.226109
Glioma	hsa-mir-23b	0.226105
Ovarian Neoplasms	hsa-mir-451	0.226036
Precursor Cell Lymphoblastic Leukemia-Lymphoma	hsa-mir-92a	0.225761
Leukemia, Lymphocytic, Chronic, B-Cell	hsa-mir-150	0.225723
Atrial Fibrillation	hsa-mir-21	0.225685
Osteosarcoma	hsa-let-7b	0.225651
Breast Neoplasms	hsa-mir-330	0.22565
Lymphoma	hsa-mir-29a	0.22557
Melanoma	hsa-mir-516b	0.225497
Pancreatic Neoplasms	hsa-mir-22	0.225353
Breast Neoplasms	hsa-mir-381	0.225331
Colonic Neoplasms	hsa-mir-130a	0.225271
Adenocarcinoma	hsa-let-7d	0.225227
Bladder Neoplasms	hsa-mir-328	0.225124
Carcinoma, Non-Small-Cell Lung	hsa-mir-32	0.225073
Scleroderma, Systemic	hsa-mir-125b	0.225019
Colorectal Neoplasms	hsa-mir-216a	0.22499
Bladder Neoplasms	hsa-mir-642a	0.22477
Prostatic Neoplasms	hsa-mir-219	0.224747
Pancreatic Neoplasms	hsa-mir-99b	0.224645
Neoplasms	hsa-mir-26b	0.224612
Stomach Neoplasms	hsa-mir-486	0.224564
Carcinoma, Squamous Cell	hsa-mir-99b	0.224502
Stomach Neoplasms	hsa-mir-197	0.224496
Bladder Neoplasms	hsa-mir-99a	0.224427
Pancreatic Neoplasms	hsa-mir-129	0.224396
Carcinoma, Squamous Cell	hsa-mir-340	0.224357
Leukemia, Lymphocytic, Chronic, B-Cell	hsa-mir-20b	0.224261
Carcinoma	hsa-mir-25	0.224247
Multiple Myeloma	hsa-mir-126	0.224109
Crohn Disease	hsa-mir-21	0.2241
Pituitary Adenomas	hsa-mir-16	0.22401
Liver Neoplasms	hsa-mir-31	0.223974
Glioma	hsa-mir-210	0.22397
Pancreatic Neoplasms	hsa-mir-130a	0.223881
Thyroid Neoplasms	hsa-mir-181b	0.223772
Small Cell Lung Carcinoma	hsa-mir-486	0.223668
Endometrial Neoplasms	hsa-mir-375	0.223585
Colorectal Neoplasms	hsa-mir-383	0.223573
Carcinoma, Basal Cell	hsa-mir-34a	0.223473
Cervical Neoplasms	hsa-mir-182	0.223332
Esophageal Neoplasms	hsa-mir-106a	0.223266
Cholangiocarcinoma	hsa-mir-145	0.223203
Esophageal Neoplasms	hsa-mir-132	0.223188
Vascular Diseases	hsa-mir-155	0.223111
Prostate Neoplasms	hsa-mir-629	0.223057
Nasopharyngeal Neoplasms	hsa-mir-92a	0.223026
Small Cell Lung Carcinoma	hsa-mir-499a	0.222995
Carcinoma	hsa-mir-429	0.222892
Acute Coronary Syndrome	hsa-mir-21	0.222836
Colonic Neoplasms	hsa-mir-375	0.222759
Toxoplasmosis	hsa-mir-19b	0.222723
Colon Neoplasms	hsa-mir-137	0.222676
Mesothelioma	hsa-mir-93	0.222404
Lung Neoplasms	hsa-mir-130b	0.22239
Carcinoma, Squamous Cell	hsa-mir-127	0.222356
Huntington Disease	hsa-mir-34c	0.222299
Carcinoma, Squamous Cell	hsa-mir-30e	0.222292
Precursor Cell Lymphoblastic Leukemia-Lymphoma	hsa-mir-222	0.222256
Stomach Neoplasms	hsa-mir-376a	0.222195
Glioblastoma	hsa-mir-199a	0.22217
Neuroblastoma	hsa-mir-125a	0.22205
Multiple Myeloma	hsa-mir-206	0.221997
Colonic Neoplasms	hsa-mir-194	0.221995
Glioma	hsa-mir-30d	0.221924
Lymphoma	hsa-mir-31	0.221872
Carcinoma, Renal Cell	hsa-mir-198	0.221832
Endometriosis	hsa-mir-34a	0.221819
Lymphoma	hsa-mir-106a	0.221697
Carcinoma, Renal Cell	hsa-mir-181a	0.221625
Leukemia, Myeloid, Acute	hsa-mir-9	0.221467
Neoplasms	hsa-mir-23b	0.221423
Astrocytoma	hsa-mir-17	0.221392
Medulloblastoma	hsa-mir-497	0.221349
Carcinoma, Renal Cell	hsa-mir-132	0.22125
Colon Neoplasms	hsa-mir-584	0.221225
Carcinoma, Non-Small-Cell Lung	hsa-mir-107	0.221167
Glomerulonephritis, IGA	hsa-mir-141	0.221145
Medulloblastoma	hsa-mir-20b	0.221027
Heart Failure	hsa-mir-146b	0.221012
Neoplasms	hsa-mir-142	0.220966
Hepatitis C	hsa-mir-146a	0.220812
Colonic Neoplasms	hsa-mir-18b	0.220735
Glioma	hsa-mir-200a	0.2207
Leukemia, B-Cell	hsa-mir-223	0.220659
Colonic Neoplasms	hsa-mir-27a	0.220564
Endometriosis	hsa-mir-19a	0.2205
Endometrial Neoplasms	hsa-mir-181a	0.220274
Carcinoma, Non-Small-Cell Lung	hsa-mir-195	0.220206
Waldenstrom Macroglobulinemia	hsa-mir-16	0.220182
Leukemia, lymphoblastic, Chronic	hsa-mir-155	0.220012
Leukemia, Myeloid	hsa-mir-181a	0.220005
Neoplasms	hsa-mir-488	0.219998
Cervical Neoplasms	hsa-mir-193b	0.21996
Adenocarcinoma	hsa-mir-218	0.21989
Nasopharyngeal Neoplasms	hsa-mir-221	0.219834
Multiple Myeloma	hsa-mir-34a	0.219747
Carcinoma, Basal Cell	hsa-mir-21	0.219708
Stomach Neoplasms	hsa-mir-455	0.219586
Lung Neoplasms	hsa-mir-424	0.219457
Coronary Artery Disease	hsa-mir-155	0.21941
Endometriosis	hsa-mir-449a	0.21938
Prostate Neoplasms	hsa-mir-378a	0.219316
Thyroid Neoplasms	hsa-mir-27a	0.219295
Medulloblastoma	hsa-mir-149	0.219237
Hypertrophy	hsa-mir-150	0.219133
Glioma	hsa-mir-30c	0.219106
Glioblastoma	hsa-mir-128	0.219096
Uterine Cervical Neoplasms	hsa-mir-18b	0.219017
Glioblastoma	hsa-mir-106a	0.218955
Melanoma	hsa-mir-520b	0.218915
Uterine Cervical Neoplasms	hsa-mir-29c	0.218844
Glioblastoma	hsa-mir-130b	0.218841
Prostate Neoplasms	hsa-mir-133b	0.218785
Neuroblastoma	hsa-mir-135a	0.218761
Carcinoma, Renal Cell	hsa-mir-27b	0.218627
Alzheimer Disease	hsa-mir-34b	0.218586
Endometriosis	hsa-mir-146a	0.21853
Leukemia, Myeloid, Acute	hsa-mir-339	0.218502
Carcinoma, Squamous Cell	hsa-mir-29a	0.218465
Urinary Bladder Neoplasms	hsa-mir-25	0.218459
Colonic Neoplasms	hsa-mir-93	0.218438
Colonic Neoplasms	hsa-mir-7	0.218303
Pancreatic Neoplasms	hsa-mir-497	0.218278
Leukemia, Myeloid, Acute	hsa-mir-92b	0.218153
Medulloblastoma	hsa-mir-15b	0.218032
Biliary Tract Neoplasms	hsa-let-7a	0.218026
Urinary Bladder Neoplasms	hsa-mir-122	0.217933
Antiphospholipid Syndrome	hsa-mir-17	0.217861
Colonic Neoplasms	hsa-mir-373	0.217815
Carcinoma, Renal Cell	hsa-mir-520b	0.217734
Diabetes Mellitus, Type 2	hsa-mir-155	0.217734
Carcinoma, Renal Cell	hsa-mir-193b	0.217725
Glioblastoma	hsa-mir-182	0.217473
Endometrial Neoplasms	hsa-mir-95	0.217423
Osteoarthritis	hsa-mir-15a	0.217403
Parkinson Disease	hsa-mir-146a	0.217382
Neoplasms	hsa-mir-219	0.217279
Glioblastoma	hsa-mir-1260a	0.217165
Glioblastoma	hsa-mir-1305	0.217165
Glioblastoma	hsa-mir-3163	0.217165
Laryngeal Neoplasms	hsa-mir-7	0.217071
Lymphoma	hsa-mir-181b	0.217027
Glioma	hsa-mir-451	0.216939
Esophageal Neoplasms	hsa-let-7g	0.216841
Lung Neoplasms	hsa-mir-373	0.216699
Head and Neck Neoplasms	hsa-mir-20b	0.216646
Bladder Neoplasms	hsa-mir-141	0.216498
Adenocarcinoma	hsa-mir-224	0.216495
Carcinoma, Squamous Cell	hsa-let-7f	0.216445
Bladder Neoplasms	hsa-mir-642b	0.216326
Osteosarcoma	hsa-mir-214	0.216312
Uterine Cervical Neoplasms	hsa-mir-15a	0.216263
Neoplasms	hsa-mir-95	0.216166
Carcinoma, Renal Cell	hsa-mir-153	0.216101
Medulloblastoma	hsa-mir-214	0.216097
Prostatic Neoplasms	hsa-mir-451	0.216042
Leukemia, Lymphocytic, Chronic, B-Cell	hsa-mir-125a	0.215999
Gastric Neoplasms	hsa-mir-486	0.215984
Uterine Cervical Neoplasms	hsa-mir-93	0.215941
Multiple Sclerosis	hsa-mir-20a	0.215884
Cervical Neoplasms	hsa-mir-194	0.215836
Urinary Bladder Neoplasms	hsa-let-7f	0.215791
Endometrial Neoplasms	hsa-mir-10b	0.215777
Neuroblastoma	hsa-mir-181b	0.215764
Gastrointestinal Neoplasms	hsa-mir-10b	0.215731
Ovarian Neoplasms	hsa-mir-124	0.215571
Glioma	hsa-mir-194	0.215547
Lung Neoplasms	hsa-mir-129	0.215422
Gastric Neoplasms	hsa-mir-375	0.215306
Lymphoma, B-Cell	hsa-let-7a	0.215293
Mycosis Fungoides	hsa-let-7g	0.215283
Eosinophilic Esophagitis	hsa-mir-221	0.215265
Laryngeal Neoplasms	hsa-mir-29c	0.215207
Esophageal Neoplasms	hsa-mir-9	0.215189
Adenocarcinoma	hsa-mir-19a	0.215108
Uterine Cervical Neoplasms	hsa-let-7d	0.215104
Glioma	hsa-mir-29c	0.215025
Hematologic Neoplasms	hsa-mir-155	0.215
Carcinoma, Hepatocellular	hsa-mir-204	0.214813
Heart Failure	hsa-mir-206	0.214765
Prolactinoma	hsa-mir-16	0.214706
Ependymoma	hsa-mir-20a	0.214688
Endometrial Neoplasms	hsa-mir-34a	0.214633
Ovarian Neoplasms	hsa-mir-32	0.214526
Leukemia, Myeloid, Acute	hsa-mir-22	0.214502
Head and Neck Neoplasms	hsa-mir-24	0.214471
Thyroid Neoplasms	hsa-mir-20a	0.214385
Uterine Cervical Neoplasms	hsa-mir-10b	0.214368
Pancreatic Neoplasms	hsa-mir-198	0.214343
Carcinoma, Ehrlich Tumor	hsa-mir-145	0.214312
Testicular Neoplasms	hsa-mir-21	0.214302
Head and Neck Neoplasms	hsa-mir-34b	0.214281
Cervical Neoplasms	hsa-mir-518a	0.214246
Head and Neck Neoplasms	hsa-mir-150	0.214201
Adenocarcinoma	hsa-let-7c	0.214187
Leukemia-Lymphoma, Adult T-Cell	hsa-mir-15a	0.214141
Heart Failure	hsa-mir-181b	0.214038
Neoplasms	hsa-mir-10a	0.213923
Multiple Myeloma	hsa-mir-145	0.213868
Lymphoma	hsa-mir-143	0.213803
Pancreatic Neoplasms	hsa-mir-29c	0.213553
Hepatitis B	hsa-mir-16	0.213543
Ovarian Neoplasms	hsa-mir-95	0.213529
Glioblastoma	hsa-mir-885	0.213359
Liver Neoplasms	hsa-mir-199a	0.213334
Lymphoma	hsa-mir-205	0.213321
Arrhythmias, Cardiac	hsa-mir-30b	0.213284
Neoplasms, Squamous Cell	hsa-mir-125b	0.213259
Prostatic Neoplasms	hsa-mir-339	0.213186
Tongue Neoplasms	hsa-mir-31	0.213155
Colorectal Neoplasms	hsa-mir-212	0.213126
Thyroid Neoplasms	hsa-mir-18a	0.213115
Adrenocortical Carcinoma	hsa-mir-141	0.213096
Muscular Disorders, Atrophic	hsa-let-7b	0.21307
Leukemia	hsa-mir-663	0.213037
Melanoma	hsa-mir-516a	0.212981
Endometrial Neoplasms	hsa-mir-16	0.212891
Leukemia, lymphoblastic, Chronic	hsa-mir-181a	0.212842
Leukemia, Myeloid, Acute	hsa-mir-141	0.212751
Glioblastoma	hsa-mir-873	0.212743
Neuroma, Acoustic	hsa-mir-7	0.212706
Lupus Erythematosus, Systemic	hsa-mir-34a	0.212671
Leukemia, B-Cell	hsa-mir-34a	0.212618
Urinary Bladder Neoplasms	hsa-mir-148a	0.212617
Lymphoma	hsa-mir-182	0.212526
Carcinoma, Squamous Cell	hsa-mir-96	0.21249
Glioma	hsa-mir-205	0.212095
Medulloblastoma	hsa-mir-155	0.212046
Leukemia, Myeloid, Acute	hsa-mir-200a	0.212004
Carcinoma	hsa-let-7d	0.21194
Uterine Cervical Neoplasms	hsa-mir-222	0.211815
Precursor Cell Lymphoblastic Leukemia-Lymphoma	hsa-mir-19b	0.211731
Thyroid Neoplasms	hsa-mir-214	0.211663
Asthma	hsa-mir-98	0.211632
Precursor Cell Lymphoblastic Leukemia-Lymphoma	hsa-mir-145	0.211611
Carcinoma, Non-Small-Cell Lung	hsa-mir-196b	0.211604
Carcinoma, Non-Small-Cell Lung	hsa-mir-198	0.211528
Neoplasms	hsa-mir-26a	0.21148
Stomach Neoplasms	hsa-mir-211	0.211463
Esophageal Neoplasms	hsa-mir-182	0.21146
Colorectal Neoplasms	hsa-mir-363	0.211444
Lymphoma	hsa-mir-29b	0.211401
Leukemia, lymphoblastic, Chronic	hsa-mir-223	0.211344
Endometrial Neoplasms	hsa-mir-34b	0.211227
Urinary Bladder Neoplasms	hsa-mir-215	0.211222
Neoplasms	hsa-mir-376c	0.21119
Adenocarcinoma	hsa-mir-7	0.211117
Cervical Neoplasms	hsa-mir-9	0.21111
Leukemia	hsa-mir-34b	0.211065
Prostate Neoplasms	hsa-mir-193a	0.210886
Glioblastoma	hsa-mir-329	0.210858
Laryngeal Neoplasms	hsa-mir-9	0.210843
Lupus Erythematosus, Systemic	hsa-mir-127	0.210819
Neoplasms, Squamous Cell	hsa-mir-20a	0.210805
Multiple Myeloma	hsa-mir-363	0.210794
Endometrial Neoplasms	hsa-mir-133a	0.210756
Ovarian Neoplasms	hsa-mir-154	0.210682
Carcinoma, Squamous Cell	hsa-mir-212	0.210579
Glioblastoma	hsa-mir-200	0.210513
Head and Neck Neoplasms	hsa-mir-140	0.210381
Myelodysplastic Syndromes	hsa-mir-223	0.210329
Prolactinoma	hsa-mir-21	0.210313
Endometriosis	hsa-mir-16	0.210243
Colon Neoplasms	hsa-mir-486	0.210162
Sarcoma, Ewing	hsa-mir-34a	0.210129
Lung Neoplasms	hsa-mir-153	0.210118
Adrenocortical Carcinoma	hsa-mir-182	0.210097
Carcinoma, Squamous Cell	hsa-mir-335	0.210094
Lupus Erythematosus, Systemic	hsa-mir-143	0.210031
Endometrial Neoplasms	hsa-mir-20a	0.210028
Precursor Cell Lymphoblastic Leukemia-Lymphoma	hsa-mir-18a	0.209992
Hepatitis C	hsa-mir-150	0.209708
Stomach Neoplasms	hsa-mir-375	0.209633
Prostatic Neoplasms	hsa-mir-367	0.209628
Endometriosis	hsa-mir-127	0.209624
Carcinoma, Renal Cell	hsa-mir-375	0.209582
Pancreatic Neoplasms	hsa-mir-137	0.209552
Carcinoma, Squamous Cell	hsa-mir-22	0.209467
Bladder Neoplasms	hsa-mir-1227	0.209413
Bladder Neoplasms	hsa-mir-1229	0.209413
Bladder Neoplasms	hsa-mir-944	0.209413
Endometrial Neoplasms	hsa-mir-196a	0.209254
Neoplasms, Squamous Cell	hsa-mir-106a	0.209217
Gastrointestinal Neoplasms	hsa-mir-141	0.2092
Leukemia, Myeloid, Acute	hsa-mir-106a	0.209179
Pancreatic Neoplasms	hsa-mir-372	0.209051
Retinoblastoma	hsa-mir-107	0.209004
Adenocarcinoma	hsa-mir-148a	0.20898
Myelodysplastic Syndromes	hsa-mir-29b	0.208637
Myocardial Ischemia	hsa-mir-133a	0.208591
Liver Neoplasms	hsa-let-7a	0.208579
Carcinoma, Renal Cell	hsa-mir-302d	0.208542
Head and Neck Neoplasms	hsa-mir-196a	0.208526
Rectal Neoplasms	hsa-mir-155	0.208522
Carcinoma, Renal Cell	hsa-mir-302a	0.208412
Leukemia, Promyelocytic, Acute	hsa-mir-181c	0.208216
Neoplasms, Glandular and Epithelial	hsa-mir-21	0.2082
Carcinoma, Non-Small-Cell Lung	hsa-mir-140	0.208141
Carcinoma, Hepatocellular	hsa-mir-455	0.208076
Leukemia, Myeloid, Acute	hsa-mir-575	0.208006
Prostatic Neoplasms	hsa-mir-186	0.207987
Schizophrenia	hsa-mir-20a	0.207976
Glioma	hsa-mir-206	0.207933
Carcinoma, Endometrioid	hsa-mir-155	0.207909
Bladder Neoplasms	hsa-mir-200c	0.207858
Medulloblastoma	hsa-mir-372	0.207845
Lung Neoplasms	hsa-mir-196b	0.207805
Lymphoma	hsa-mir-222	0.207766
Carcinoma, Hepatocellular	hsa-mir-301b	0.207731
Neoplasms	hsa-mir-198	0.207731
Heart Failure	hsa-mir-221	0.207703
Uterine Cervical Neoplasms	hsa-mir-223	0.207683
Glioma	hsa-mir-199b	0.207677
Heart Failure	hsa-mir-200b	0.207568
Prostate Neoplasms	hsa-mir-642a	0.207554
Nasopharyngeal Neoplasms	hsa-mir-125b	0.207529
Retinoblastoma	hsa-mir-183	0.207456
Leukemia, B-Cell	hsa-mir-181a	0.207421
Atherosclerosis	hsa-mir-125b	0.207354
Leukemia, Myeloid, Acute	hsa-mir-660	0.207253
Colon Neoplasms	hsa-mir-18a	0.207188
Head and Neck Neoplasms	hsa-mir-214	0.207186
Prostatic Neoplasms	hsa-mir-376c	0.207167
Medulloblastoma	hsa-mir-7	0.207039
Adenocarcinoma	hsa-mir-137	0.207019
Mouth Neoplasms	hsa-mir-145	0.206929
Glioblastoma	hsa-mir-192	0.206926
Asthma	hsa-mir-21	0.206691
Laryngeal Neoplasms	hsa-mir-146a	0.206684
Colorectal Neoplasms	hsa-mir-381	0.206453
Adenocarcinoma	hsa-mir-199a	0.206437
Pituitary Adenomas	hsa-mir-15a	0.206378
Stomach Neoplasms	hsa-mir-154	0.206374
Prostate Neoplasms	hsa-mir-642b	0.206367
Thyroid Neoplasms	hsa-mir-29c	0.206319
Digestive System Neoplasms	hsa-mir-21	0.206244
Prostate Neoplasms	hsa-mir-21	0.206135
Neoplasms	hsa-mir-130a	0.206127
Adenoviridae Infections	hsa-mir-30d	0.206114
Adrenocortical Carcinoma	hsa-mir-214	0.206072
Osteosarcoma	hsa-mir-9	0.206066
Osteosarcoma	hsa-mir-598	0.20586
Waldenstrom Macroglobulinemia	hsa-mir-335	0.205822
Colonic Neoplasms	hsa-mir-98	0.205819
Prostate Neoplasms	hsa-mir-141	0.205722
Carcinoma	hsa-mir-181a	0.205681
Esophageal Neoplasms	hsa-mir-122	0.205647
Thyroid Neoplasms	hsa-mir-199a	0.205641
Endometriosis	hsa-mir-192	0.205587
Prostatic Neoplasms	hsa-mir-140	0.205505
Arthritis, Rheumatoid	hsa-mir-146b	0.205455
Stomach Neoplasms	hsa-mir-144	0.205339
Diabetic Nephropathies	hsa-mir-126	0.205295
Melanoma	hsa-mir-130b	0.205199
Barrett Esophagus	hsa-mir-126	0.205163
Head and Neck Neoplasms	hsa-mir-15b	0.205162
Carcinoma, Renal Cell	hsa-mir-148a	0.205003
Hepatitis B	hsa-mir-146b	0.204907
Hepatitis C	hsa-mir-126	0.204813
Leukemia, Myeloid, Acute	hsa-mir-132	0.204789
Eosinophilic Esophagitis	hsa-mir-143	0.204701
Glioblastoma	hsa-mir-323b	0.20462
Glioblastoma	hsa-mir-451a	0.204527
Carcinoma, Hepatocellular	hsa-mir-638	0.204526
Neoplasms, Squamous Cell	hsa-mir-106b	0.204484
Glioma	hsa-mir-491	0.204476
Urinary Bladder Neoplasms	hsa-let-7i	0.204461
Lung Neoplasms	hsa-mir-339	0.204428
Glioma	hsa-mir-200c	0.204375
Neoplasms	hsa-mir-342	0.204374
Hepatitis B	hsa-let-7b	0.204339
Ovarian Neoplasms	hsa-mir-139	0.204335
Leukemia, Myeloid	hsa-mir-34a	0.204327
Carcinoma, Squamous Cell	hsa-mir-494	0.204323
Liver Neoplasms	hsa-mir-148a	0.204163
Carcinoma	hsa-mir-203	0.204142
Esophageal Neoplasms	hsa-mir-424	0.204118
Carcinoma	hsa-mir-9	0.203996
Medulloblastoma	hsa-mir-181a	0.203898
Adrenocortical Carcinoma	hsa-mir-34a	0.203878
Leukoplakia, Oral	hsa-mir-21	0.203831
Thyroid Neoplasms	hsa-mir-224	0.203831
Adenocarcinoma	hsa-mir-23b	0.20382
Skin Neoplasms	hsa-mir-125b	0.20382
Sarcoma, Ewing's	hsa-mir-150	0.203808
Glioma	hsa-mir-101	0.203699
Toxoplasmosis	hsa-mir-92a	0.203535
Endometrial Neoplasms	hsa-mir-223	0.203494
Urinary Bladder Neoplasms	hsa-mir-198	0.203397
Breast Neoplasms	hsa-mir-363	0.203389
Kidney Neoplasms	hsa-mir-429	0.203383
Gastrointestinal Neoplasms	hsa-mir-223	0.20332
Esophageal Neoplasms	hsa-mir-24	0.203296
Prostatic Neoplasms	hsa-mir-28	0.203266
Cardiomyopathy, Hypertrophic	hsa-mir-30b	0.203252
Lung Neoplasms	hsa-mir-708	0.203133
Neuroblastoma	hsa-mir-31	0.203072
Precursor B-Cell Lymphoblastic Leukemia-Lymphoma	hsa-mir-223	0.203053
Glioblastoma	hsa-mir-539	0.203046
Carcinoma, Hepatocellular	hsa-mir-154	0.203042
Endometriosis	hsa-mir-210	0.203006
Lymphoma, Mantle-Cell	hsa-mir-21	0.202998
Lymphoma, B-Cell	hsa-mir-92b	0.20299
Glioma	hsa-mir-429	0.202904
Carcinoma, Non-Small-Cell Lung	hsa-mir-219	0.202903
Adenocarcinoma	hsa-mir-135b	0.2028
Prostate Neoplasms	hsa-mir-521	0.202743
Retinoblastoma	hsa-mir-143	0.202741
Lymphoma, Primary Effusion	hsa-mir-21	0.202708
Liver Cirrhosis	hsa-mir-1	0.202668
Urinary Bladder Neoplasms	hsa-mir-151	0.202653
Breast Neoplasms	hsa-mir-658	0.202619
Urinary Bladder Neoplasms	hsa-mir-26a	0.202606
Lymphoma	hsa-mir-96	0.202605
Thyroid Neoplasms	hsa-mir-205	0.202567
Leukemia, Myeloid, Acute	hsa-mir-205	0.202522
Carcinoma, Squamous Cell	hsa-mir-198	0.202335
Lymphoma, Large B-Cell, Diffuse	hsa-mir-222	0.202318
Bladder Neoplasms	hsa-mir-1224	0.202295
Urinary Bladder Neoplasms	hsa-mir-339	0.202232
Lymphoma, B-Cell	hsa-mir-106b	0.2022
Carcinoma, Hepatocellular	hsa-mir-363	0.202068
Myocardial Infarction	hsa-mir-107	0.202044
Hepatitis C	hsa-mir-17	0.202035
Neoplasms, Squamous Cell	hsa-mir-145	0.201965
Osteosarcoma	hsa-mir-206	0.20192
Thyroid Neoplasms	hsa-let-7c	0.201913
Ovarian Neoplasms	hsa-mir-301a	0.20186
Carcinoma, Non-Small-Cell Lung	hsa-mir-335	0.201836
Osteosarcoma	hsa-mir-34a	0.20172
Thyroid Neoplasms	hsa-mir-181d	0.201675
Carcinoma, Non-Small-Cell Lung	hsa-mir-99b	0.201635
Carcinoma, Squamous Cell	hsa-mir-130b	0.201573
Uterine Cervical Neoplasms	hsa-mir-302c	0.201514
Carcinoma, Hepatocellular	hsa-mir-33a	0.201478
Colorectal Neoplasms, Hereditary Nonpolyposis	hsa-mir-21	0.201404
Laryngeal Neoplasms	hsa-mir-143	0.201303
Thyroid Neoplasms	hsa-mir-15a	0.201268
Liver Neoplasms	hsa-mir-221	0.201243
Medulloblastoma	hsa-mir-93	0.201155
Carcinoma, Squamous Cell	hsa-mir-107	0.201125
Astrocytoma	hsa-mir-135a	0.201107
Waldenstrom Macroglobulinemia	hsa-mir-92a	0.201091
Hepatitis B	hsa-mir-92a	0.201081
Head and Neck Neoplasms	hsa-mir-144	0.201044
Leukemia, lymphoblastic, Chronic	hsa-mir-221	0.20104
Uterine Cervical Neoplasms	hsa-mir-133a	0.200961
AIDS Dementia Complex	hsa-mir-146a	0.200819
Endometrial Neoplasms	hsa-mir-17	0.200766
Prostatic Neoplasms	hsa-mir-376a	0.200586
Lung Neoplasms	hsa-mir-148b	0.200495
Osteosarcoma	hsa-mir-23b	0.200459
Hepatitis B	hsa-mir-34a	0.200445
Lymphoma, T-Cell	hsa-mir-15a	0.200435
Prostate Neoplasms	hsa-mir-1256	0.200412
Prostate Neoplasms	hsa-mir-1296	0.200412
Prostate Neoplasms	hsa-mir-616	0.200412
Prostate Neoplasms	hsa-mir-647	0.200412
Leukemia, Lymphocytic, Chronic, B-Cell	hsa-mir-145	0.200311
Head and Neck Neoplasms	hsa-mir-137	0.200265
Parkinson Disease	hsa-mir-30d	0.200254
Gastrointestinal Neoplasms	hsa-let-7i	0.200212
Osteosarcoma	hsa-let-7e	0.200175
Hepatitis B	hsa-mir-196b	0.200127
Neuroblastoma	hsa-mir-18b	0.200111
Cervical Neoplasms	hsa-mir-345	0.200058
Prostate Neoplasms	hsa-mir-519d	0.199962
Melanoma	hsa-mir-28	0.199948
Ovarian Neoplasms	hsa-mir-130b	0.199919
Gastrointestinal Neoplasms	hsa-mir-34a	0.199781
Prostatic Neoplasms	hsa-mir-10a	0.199639
Myelodysplastic Syndromes	hsa-mir-19a	0.199638
Nasopharyngeal Neoplasms	hsa-mir-145	0.199335
Leukemia, B-Cell	hsa-mir-146a	0.199265
Gout	hsa-mir-520c	0.199216
Carcinoma, Squamous Cell	hsa-mir-23a	0.199187
Neoplasms	hsa-mir-124	0.199122
Carcinoma, Renal Cell	hsa-mir-106a	0.19911
Gout	hsa-mir-526a	0.199045
Hodgkin Disease	hsa-mir-125b	0.198999
Endometrial Neoplasms	hsa-mir-215	0.198916
Bladder Neoplasms	hsa-mir-517a	0.198866
Glioblastoma	hsa-mir-193a	0.198775
Bladder Neoplasms	hsa-mir-1280	0.198695
Osteosarcoma	hsa-mir-150	0.198511
Lymphoma	hsa-mir-10b	0.198474
Leukemia, Lymphocytic, Chronic, B-Cell	hsa-mir-9	0.198428
Carcinoma, Renal Cell	hsa-mir-107	0.198408
Carcinoma, Renal Cell	hsa-mir-488	0.198397
Head and Neck Neoplasms	hsa-mir-98	0.198397
Sarcoma, Ewing	hsa-let-7a	0.198386
Adenocarcinoma	hsa-mir-125a	0.198378
Neoplasms, Squamous Cell	hsa-mir-124	0.198343
Inflammation	hsa-mir-98	0.198339
Thyroid Neoplasms	hsa-mir-17	0.198335
Mouth Neoplasms	hsa-mir-143	0.198314
Carcinoma	hsa-mir-223	0.198292
Adenocarcinoma	hsa-mir-30c	0.198251
Carcinoma, Hepatocellular	hsa-mir-153	0.198213
Pancreatic Neoplasms	hsa-mir-148b	0.198209
Myotonic Dystrophy	hsa-mir-146a	0.198129
Osteosarcoma	hsa-mir-101	0.198094
Glomerulonephritis, IGA	hsa-mir-200c	0.198055
Leukemia, Lymphocytic, Chronic, B-Cell	hsa-mir-199a	0.197983
Carcinoma, Ehrlich Tumor	hsa-mir-21	0.197977
Carcinoma, Renal Cell	hsa-mir-373	0.197961
Head and Neck Neoplasms	hsa-mir-29a	0.19784
Leukemia, lymphoblastic, Chronic	hsa-mir-17	0.197788
Uterine Cervical Neoplasms	hsa-mir-29b	0.197725
Glioma	hsa-mir-142	0.19765
Endometriosis	hsa-mir-205	0.19759
Stomach Neoplasms	hsa-mir-337	0.197588
Urinary Bladder Neoplasms	hsa-mir-153	0.197513
Eclampsia	hsa-mir-155	0.197512
Inflammatory Bowel Diseases	hsa-mir-126	0.197508
Neuroblastoma	hsa-mir-135b	0.197399
Precursor B-Cell Lymphoblastic Leukemia-Lymphoma	hsa-mir-221	0.197281
Head and Neck Neoplasms	hsa-mir-206	0.197263
Adenocarcinoma	hsa-mir-124	0.197245
Adrenocortical Carcinoma	hsa-mir-183	0.197225
Bladder Neoplasms	hsa-mir-503	0.197186
Breast Neoplasms	hsa-mir-181d	0.19718
Leukemia, Lymphocytic, Chronic, B-Cell	hsa-mir-199b	0.197103
Carcinoma	hsa-mir-93	0.197083
Heart Failure	hsa-mir-7	0.19683
Glioblastoma	hsa-mir-302d	0.196772
Pituitary Neoplasms	hsa-mir-26a	0.196732
Myotonic Dystrophy	hsa-mir-29a	0.196644
Liver Neoplasms	hsa-let-7g	0.196612
Esophageal Neoplasms	hsa-mir-181a	0.196592
Carcinoma	hsa-mir-15a	0.196562
Prostatic Neoplasms	hsa-mir-497	0.196533
Urinary Bladder Neoplasms	hsa-mir-30a	0.196511
Ependymoma	hsa-mir-18a	0.19646
Schizophrenia	hsa-mir-18a	0.196248
Diabetic Nephropathies	hsa-mir-429	0.196197
Leukemia, Lymphocytic, Chronic, B-Cell	hsa-mir-143	0.196174
Gastrointestinal Neoplasms	hsa-mir-210	0.196111
Breast Neoplasms	hsa-mir-376a	0.19609
Leukemia, Myeloid, Chronic-Phase	hsa-mir-155	0.196057
Lung Neoplasms	hsa-mir-376c	0.196034
Glioma	hsa-mir-340	0.196033
Esophageal Neoplasms	hsa-mir-224	0.196007
Medulloblastoma	hsa-mir-16	0.195976
Hepatitis B	hsa-mir-19b	0.195975
Myocardial Infarction	hsa-mir-19b	0.195906
Burkitt Lymphoma	hsa-mir-221	0.195873
Carcinoma, Basal Cell	hsa-mir-96	0.195858
Lymphoma, B-Cell	hsa-mir-146b	0.195856
Skin Neoplasms	hsa-mir-21	0.195848
Carcinoma, Non-Small-Cell Lung	hsa-mir-338	0.195742
Gastrointestinal Neoplasms	hsa-mir-143	0.195716
Glioblastoma	hsa-mir-339	0.195714
Colon Neoplasms	hsa-mir-152	0.195696
Bladder Neoplasms	hsa-mir-493	0.195651
Ependymoma	hsa-mir-137	0.1956
Antiphospholipid Syndrome	hsa-mir-18a	0.195576
Cervical Neoplasms	hsa-mir-200a	0.195572
Liver Neoplasms	hsa-mir-29b	0.19556
Prostate Neoplasms	hsa-mir-320a	0.195558
Adenocarcinoma	hsa-mir-132	0.195545
Carcinoma, Renal Cell	hsa-mir-181d	0.195527
Antiphospholipid Syndrome	hsa-mir-19a	0.195479
Eosinophilic Esophagitis	hsa-mir-126	0.19545
Uterine Cervical Neoplasms	hsa-let-7c	0.195421
Prostatic Neoplasms	hsa-mir-30e	0.195203
Glioblastoma	hsa-mir-17	0.195188
Colorectal Neoplasms	hsa-mir-561	0.195157
Kidney Neoplasms	hsa-mir-205	0.19513
Thyroid Neoplasms	hsa-mir-125a	0.195043
Osteosarcoma	hsa-mir-106a	0.195033
Glioma	hsa-mir-95	0.195022
Bladder Neoplasms	hsa-mir-133b	0.195022
Myelodysplastic Syndromes	hsa-mir-15b	0.194964
Colonic Neoplasms	hsa-mir-124	0.194931
Adenocarcinoma	hsa-mir-18b	0.194782
Lung Neoplasms	hsa-mir-151	0.194734
Diabetic Nephropathies	hsa-mir-155	0.194727
Carcinoma, Non-Small-Cell Lung	hsa-mir-137	0.194708
Atrial Fibrillation	hsa-mir-18a	0.194532
Head and Neck Neoplasms	hsa-mir-27a	0.194457
Retinoblastoma	hsa-mir-155	0.194409
Gastric Neoplasms	hsa-mir-16	0.1944
Adrenocortical Carcinoma	hsa-mir-99a	0.194303
Leukemia, Myeloid, Acute	hsa-mir-1	0.194263
Colonic Neoplasms	hsa-mir-30b	0.194182
Nasopharyngeal Neoplasms	hsa-mir-133a	0.194121
Uterine Cervical Neoplasms	hsa-mir-339	0.193993
Pancreatic Neoplasms	hsa-mir-20b	0.193967
Leukemia, Lymphocytic, Chronic, B-Cell	hsa-mir-132	0.193921
Neoplasms, Squamous Cell	hsa-mir-10b	0.193917
Glioblastoma	hsa-mir-215	0.193809
Adenocarcinoma	hsa-mir-30a	0.19372
Sjogren's Syndrome	hsa-mir-155	0.193707
Carcinoma	hsa-mir-150	0.193704
Lymphoma, Non-Hodgkin	hsa-mir-92a	0.193675
Thyroid Neoplasms	hsa-let-7i	0.193669
Medulloblastoma	hsa-mir-30c	0.193656
Inflammation	hsa-mir-133a	0.193625
Carcinoma, Basal Cell	hsa-mir-19a	0.193624
Colon Neoplasms	hsa-mir-107	0.193601
Gastrointestinal Neoplasms	hsa-mir-27a	0.193576
Heart Failure	hsa-mir-25	0.193574
Carcinoma, Renal Cell	hsa-mir-451	0.193572
Uterine Cervical Neoplasms	hsa-mir-99a	0.193564
Uterine Cervical Neoplasms	hsa-mir-183	0.193481
Glioblastoma	hsa-mir-425	0.19347
Head and Neck Neoplasms	hsa-mir-184	0.193428
Carcinoma, Neuroendocrine	hsa-mir-145	0.193422
Adenocarcinoma	hsa-mir-146b	0.193416
Endometriosis	hsa-mir-133a	0.193373
Pancreatic Neoplasms	hsa-mir-424	0.193337
Neoplasms	hsa-mir-99b	0.193317
Pre-Eclampsia	hsa-mir-195	0.19316
Lymphoma	hsa-mir-106b	0.193151
Leukemia, lymphoblastic, Acute	hsa-mir-222	0.193029
Small Cell Lung Carcinoma	hsa-mir-574	0.192973
Hepatitis B	hsa-mir-223	0.192969
Leukemia, Myeloid, Acute	hsa-mir-107	0.192901
Muscular Dystrophies	hsa-mir-1	0.192891
Mesothelioma	hsa-mir-125b	0.192884
Carcinoma	hsa-let-7c	0.192853
Cervical Neoplasms	hsa-mir-205	0.192783
Myotonic Dystrophy	hsa-mir-133a	0.192774
Medulloblastoma	hsa-mir-222	0.192766
Prolactinoma	hsa-mir-15a	0.192754
Carcinoma	hsa-mir-204	0.1927
Carcinoma, Renal Cell	hsa-mir-95	0.19269
Neoplasms	hsa-mir-363	0.192677
Hepatitis C	hsa-mir-18a	0.192643
Multiple Sclerosis	hsa-mir-29c	0.19255
Biliary Tract Neoplasms	hsa-let-7b	0.192425
Adrenocortical Carcinoma	hsa-mir-221	0.192377
Cardiomyopathy, Dilated	hsa-mir-208a	0.192211
Leukemia, Lymphocytic, Chronic, B-Cell	hsa-mir-26a	0.192165
Prostate Neoplasms	hsa-mir-378b	0.192073
Prostate Neoplasms	hsa-mir-378c	0.192073
Prostate Neoplasms	hsa-mir-378d	0.192073
Prostate Neoplasms	hsa-mir-378e	0.192073
Prostate Neoplasms	hsa-mir-378f	0.192073
Prostate Neoplasms	hsa-mir-378g	0.192073
Prostate Neoplasms	hsa-mir-378h	0.192073
Prostate Neoplasms	hsa-mir-378i	0.192073
Adenocarcinoma	hsa-mir-150	0.192052
Glioblastoma	hsa-mir-27a	0.192014
Mycosis Fungoides	hsa-let-7i	0.191894
Glioma	hsa-mir-219	0.191886
Prostatic Neoplasms	hsa-mir-302a	0.191876
Leukemia, Myeloid, Acute	hsa-mir-454	0.191865
Colorectal Neoplasms	hsa-mir-488	0.19185
Leukemia, Myeloid, Acute	hsa-mir-214	0.191766
Parkinson Disease	hsa-mir-342	0.19174
Neoplasms, Squamous Cell	hsa-mir-34b	0.191724
Muscular Disorders, Atrophic	hsa-mir-133a	0.191665
Mesothelioma	hsa-mir-24	0.191651
Bladder Neoplasms	hsa-mir-96	0.19165
Melanoma	hsa-mir-198	0.191622
Stomach Neoplasms	hsa-mir-152	0.191574
Adenocarcinoma	hsa-mir-27a	0.191509
Hepatitis B	hsa-mir-127	0.191475
Leukemia, lymphoblastic, Chronic	hsa-mir-92a	0.191473
Scleroderma, Localized	hsa-mir-146a	0.191442
Glioma	hsa-mir-22	0.191374
Neoplasms, Squamous Cell	hsa-mir-182	0.191259
Hepatitis C	hsa-mir-106b	0.191208
Lymphoma, B-Cell	hsa-mir-222	0.191001
Lymphoma, T-Cell	hsa-mir-21	0.190981
Retinoblastoma	hsa-mir-137	0.190885
Colorectal Neoplasms	hsa-mir-484	0.190877
Medulloblastoma	hsa-mir-100	0.190858
Prostatic Neoplasms	hsa-mir-338	0.190841
Parkinson Disease	hsa-mir-30e	0.190827
Small Cell Lung Carcinoma	hsa-mir-193a	0.19079
Atherosclerosis	hsa-mir-199a	0.190784
Cardiomegaly	hsa-mir-23a	0.190776
Colonic Neoplasms	hsa-mir-339	0.190706
Retinoblastoma	hsa-mir-126	0.19069
Thyroid Neoplasms	hsa-mir-210	0.190619
Hepatitis C	hsa-mir-15a	0.190552
Stomach Neoplasms	hsa-mir-454	0.190456
Carcinoma, Squamous Cell	hsa-mir-148b	0.190435
Lung Neoplasms	hsa-mir-204	0.190393
Colonic Neoplasms	hsa-mir-95	0.190361
Urinary Bladder Neoplasms	hsa-let-7g	0.190358
Endometriosis	hsa-mir-101	0.19026
Osteosarcoma	hsa-mir-181d	0.190077
Neoplasms, Squamous Cell	hsa-mir-31	0.190022
Scleroderma, Localized	hsa-mir-29b	0.189988
Mouth Neoplasms	hsa-mir-34b	0.189893
Stroke	hsa-mir-21	0.189874
Astrocytoma	hsa-mir-222	0.189855
Obesity	hsa-mir-20a	0.189788
Muscular Disorders, Atrophic	hsa-let-7a	0.189775
Glioblastoma	hsa-mir-375	0.189668
Glioma	hsa-mir-133a	0.189582
Coronary Artery Disease	hsa-mir-133b	0.189543
Neoplasms, Squamous Cell	hsa-mir-138	0.189519
Myelodysplastic Syndromes	hsa-mir-92a	0.189513
Thyroid Neoplasms	hsa-mir-143	0.189512
Lymphoma, Non-Hodgkin	hsa-mir-16	0.189438
Glioma	hsa-mir-141	0.189433
Leukemia	hsa-mir-142	0.189428
Laryngeal Neoplasms	hsa-mir-223	0.189368
Nasopharyngeal Neoplasms	hsa-mir-222	0.189334
Reperfusion Injury	hsa-mir-17	0.189294
Carcinoma, Renal Cell	hsa-mir-449a	0.18923
Carcinoma, Non-Small-Cell Lung	hsa-mir-520h	0.189228
Parkinson Disease	hsa-mir-196a	0.189144
Neoplasms	hsa-mir-338	0.189133
Mouth Neoplasms	hsa-mir-9	0.189131
Pancreatic Neoplasms	hsa-mir-23b	0.18911
Small Cell Lung Carcinoma	hsa-mir-138	0.189053
Adrenocortical Carcinoma	hsa-mir-151	0.189018
Endometrial Neoplasms	hsa-mir-98	0.188947
Pancreatic Neoplasms	hsa-mir-92b	0.188852
Adrenocortical Carcinoma	hsa-let-7i	0.188848
Endometriosis	hsa-mir-130a	0.188847
Myocardial Infarction	hsa-mir-145	0.188819
Prostate Neoplasms	hsa-mir-143	0.188773
Carcinoma, Renal Cell	hsa-mir-338	0.188725
Carcinoma, Hepatocellular	hsa-mir-302d	0.188707
Parkinson Disease	hsa-mir-24	0.188666
Endometrial Neoplasms	hsa-mir-19b	0.188643
Waldenstrom Macroglobulinemia	hsa-mir-20a	0.188639
Prostate Neoplasms	hsa-mir-151b	0.188618
Cholangiocarcinoma	hsa-mir-155	0.188587
Glioblastoma	hsa-mir-145	0.188559
Diabetes Mellitus, Type 2	hsa-mir-29c	0.188511
Leukemia, lymphoblastic, Acute	hsa-mir-181a	0.188439
Endometrial Neoplasms	hsa-mir-199a	0.188424
Multiple Sclerosis	hsa-mir-19b	0.188321
Prostate Neoplasms	hsa-mir-151a	0.188258
Medulloblastoma	hsa-mir-199a	0.188237
Astrocytoma	hsa-mir-145	0.188218
Astrocytoma	hsa-mir-146b	0.188157
Adenocarcinoma	hsa-mir-20b	0.188105
Tongue Neoplasms	hsa-mir-21	0.188094
Pancreatic Neoplasms	hsa-mir-140	0.188083
Endometrial Neoplasms	hsa-mir-101	0.188064
Colon Neoplasms	hsa-mir-19a	0.188015
Glioblastoma	hsa-mir-296	0.188003
Kidney Neoplasms	hsa-mir-708	0.187756
Glioblastoma	hsa-mir-31	0.187728
Inflammation	hsa-mir-16	0.187683
Pancreatic Neoplasms	hsa-mir-153	0.187315
Colon Neoplasms	hsa-mir-133b	0.187299
Polycythemia Vera	hsa-mir-10a	0.187299
Medulloblastoma	hsa-mir-138	0.187292
Ischemia	hsa-mir-29a	0.187215
Heart Failure	hsa-mir-451	0.187101
ACTH-Secreting Pituitary Adenoma	hsa-mir-125b	0.18699
Prostatic Neoplasms	hsa-mir-520b	0.186856
Heart Failure	hsa-mir-93	0.186844
Leukemia, Myeloid, Acute	hsa-mir-30a	0.186828
Head and Neck Neoplasms	hsa-mir-199a	0.186826
Endometriosis	hsa-mir-92a	0.186806
Urinary Bladder Neoplasms	hsa-mir-193b	0.186795
Leukemia	hsa-mir-221	0.18671
Coronary Artery Disease	hsa-mir-146a	0.186702
Adenocarcinoma	hsa-mir-139	0.186664
Ependymoma	hsa-mir-34a	0.186618
Lung Neoplasms	hsa-mir-99a	0.186587
Precursor T-Cell Lymphoblastic Leukemia-Lymphoma	hsa-mir-125b	0.186582
Lung Neoplasms	hsa-mir-378a	0.186544
Prostate Neoplasms	hsa-mir-152	0.186496
Choriocarcinoma	hsa-mir-143	0.186459
Urinary Bladder Neoplasms	hsa-mir-335	0.186354
Thyroid Neoplasms	hsa-mir-296	0.18627
Medulloblastoma	hsa-mir-27b	0.186237
Medulloblastoma	hsa-mir-107	0.186196
Mouth Neoplasms	hsa-mir-1	0.186178
Glioblastoma	hsa-mir-143	0.186173
Neoplasms	hsa-mir-497	0.186144
Hodgkin Disease	hsa-mir-101	0.186079
Leukemia, Myeloid, Acute	hsa-mir-30e	0.186042
Prostatic Neoplasms	hsa-mir-144	0.186016
Carcinoma	hsa-mir-451	0.18589
Lymphoma	hsa-mir-542	0.185874
Carcinoma	hsa-mir-133a	0.185869
Melanoma	hsa-mir-424	0.185867
Colonic Neoplasms	hsa-mir-30e	0.185853
Endometriosis	hsa-mir-183	0.185829
Astrocytoma	hsa-mir-143	0.185765
Nasopharyngeal Neoplasms	hsa-mir-191	0.18576
Small Cell Lung Carcinoma	hsa-mir-134	0.185715
Glioblastoma	hsa-mir-30b	0.185648
Hypertension	hsa-mir-126	0.185613
Gastrointestinal Neoplasms	hsa-mir-148b	0.185608
Carcinoma, Non-Small-Cell Lung	hsa-mir-452	0.185583
Gastric Neoplasms	hsa-mir-101	0.185432
Lymphoma, Large-Cell, Anaplastic	hsa-mir-16	0.1854
Leukemia, Lymphocytic, Chronic, B-Cell	hsa-mir-191	0.185296
Muscular Disorders, Atrophic	hsa-mir-29b	0.185167
Stomach Neoplasms	hsa-mir-31	0.185101
Colon Neoplasms	hsa-mir-146a	0.184922
Alzheimer Disease	hsa-mir-19b	0.184858
Liver Neoplasms	hsa-mir-1	0.184853
Pancreatic Neoplasms	hsa-mir-339	0.184844
Scleroderma, Systemic	hsa-mir-223	0.184782
Hodgkin Disease	hsa-mir-26a	0.18471
Endometriosis	hsa-mir-30c	0.184693
Carcinoma, Non-Small-Cell Lung	hsa-mir-301a	0.184497
Rectal Neoplasms	hsa-mir-31	0.184471
Medulloblastoma	hsa-mir-99b	0.184376
Prostatic Neoplasms	hsa-mir-129	0.184208
Aortic Valve Stenosis	hsa-mir-133a	0.184197
Bladder Neoplasms	hsa-mir-27a	0.184181
Gastrointestinal Neoplasms	hsa-let-7e	0.184085
Adenoviridae Infections	hsa-mir-139	0.184022
Adenocarcinoma	hsa-mir-15b	0.18401
Uterine Cervical Neoplasms	hsa-mir-151	0.18397
Prostatic Neoplasms	hsa-mir-148b	0.183908
Stomach Neoplasms	hsa-mir-423	0.183885
Arthritis, Rheumatoid	hsa-mir-21	0.183839
Ovarian Neoplasms	hsa-mir-198	0.18383
Lung Neoplasms	hsa-mir-452	0.183797
Osteosarcoma	hsa-mir-199b	0.183796
Colonic Neoplasms	hsa-mir-302c	0.183791
Colonic Neoplasms	hsa-mir-27b	0.183731
Myocardial Infarction	hsa-mir-125b	0.183717
Thyroid Neoplasms	hsa-mir-486	0.183711
Ovarian Neoplasms	hsa-mir-497	0.183667
Pancreatic Neoplasms	hsa-mir-30e	0.183604
Neuroblastoma	hsa-mir-155	0.1836
Colorectal Neoplasms	hsa-mir-449b	0.183567
Ovarian Neoplasms	hsa-mir-149	0.183558
Gastric Neoplasms	hsa-mir-31	0.18355
Urinary Bladder Neoplasms	hsa-mir-219	0.183509
Carcinoma, Hepatocellular	hsa-mir-383	0.183482
Glioma	hsa-mir-150	0.183461
Glioma	hsa-mir-193b	0.183449
Carcinoma	hsa-mir-1	0.183431
Biliary Tract Neoplasms	hsa-mir-21	0.183322
Retinoblastoma	hsa-mir-200b	0.183241
Endometriosis	hsa-mir-221	0.183238
Colon Neoplasms	hsa-mir-622	0.183217
Myocardial Infarction	hsa-mir-19a	0.183096
Urinary Bladder Neoplasms	hsa-mir-372	0.183079
Retinoblastoma	hsa-mir-34b	0.183018
Gout	hsa-mir-515	0.182993
Prostate Neoplasms	hsa-mir-203	0.182956
Muscular Disorders, Atrophic	hsa-mir-17	0.182952
Esophageal Neoplasms	hsa-mir-335	0.182941
Myocardial Ischemia	hsa-mir-1	0.182894
Lymphoma, B-Cell	hsa-mir-101	0.182735
Muscular Disorders, Atrophic	hsa-mir-125b	0.182671
Precursor Cell Lymphoblastic Leukemia-Lymphoma	hsa-mir-15a	0.182661
Esophageal Neoplasms	hsa-mir-181b	0.182605
Lung Neoplasms	hsa-mir-342	0.182604
Hodgkin Disease	hsa-mir-20b	0.182571
Colonic Neoplasms	hsa-mir-206	0.182532
Gastrointestinal Neoplasms	hsa-let-7d	0.182459
Melanoma	hsa-mir-216b	0.182451
Bladder Neoplasms	hsa-mir-100	0.182365
Ovarian Neoplasms	hsa-mir-516b	0.182335
Carcinoma, Renal Cell	hsa-mir-149	0.182256
Head and Neck Neoplasms	hsa-mir-92b	0.182215
Liver Neoplasms	hsa-mir-126	0.182031
Glioblastoma	hsa-mir-302b	0.182006
Colonic Neoplasms	hsa-mir-99a	0.181968
Thyroid Neoplasms	hsa-mir-133a	0.181899
Mesothelioma	hsa-mir-16	0.181867
Endometrial Neoplasms	hsa-mir-19a	0.181859
Adrenocortical Carcinoma	hsa-mir-20a	0.181858
Lung Neoplasms	hsa-mir-181d	0.181827
Medulloblastoma	hsa-mir-204	0.181827
Neuroblastoma	hsa-mir-153	0.181714
Pancreatic Neoplasms	hsa-mir-342	0.181713
Glioma	hsa-mir-26a	0.181622
Neuroblastoma	hsa-mir-149	0.181605
Stomach Neoplasms	hsa-mir-663	0.181503
Glioblastoma	hsa-mir-208a	0.181434
Myocytes, Cardiac	hsa-mir-1	0.181423
Urinary Bladder Neoplasms	hsa-mir-22	0.181354
Leukemia, lymphoblastic, Chronic	hsa-mir-19a	0.181311
Osteosarcoma	hsa-mir-132	0.181305
Glioblastoma	hsa-mir-138	0.181276
Adrenocortical Adenoma	hsa-mir-200c	0.1812
Neoplasms, Squamous Cell	hsa-mir-15a	0.181165
Sarcoma, Ewing's	hsa-mir-371a	0.181122
Lung Neoplasms	hsa-mir-340	0.181116
Leukemia	hsa-mir-29a	0.18105
Endometrial Neoplasms	hsa-mir-135b	0.181032
Lymphoma	hsa-mir-141	0.180986
Mesothelioma	hsa-mir-27a	0.180967
Retinoblastoma	hsa-mir-218	0.180957
Liver Neoplasms	hsa-mir-200b	0.18095
Uterine Cervical Neoplasms	hsa-mir-96	0.180937
Leukemia, lymphoblastic, Chronic	hsa-mir-15a	0.18093
Leukemia-Lymphoma, Adult T-Cell	hsa-mir-223	0.180909
Leukemia, Myeloid, Acute	hsa-mir-31	0.180906
Arrhythmias, Cardiac	hsa-mir-155	0.180868
Uterine Cervical Neoplasms	hsa-mir-142	0.180851
Leukemia, Myeloid, Chronic-Phase	hsa-mir-181a	0.180823
Neuroblastoma	hsa-mir-143	0.180817
Thyroid Neoplasms	hsa-mir-135b	0.180786
Cardiomyopathies	hsa-mir-133a	0.180746
Head and Neck Neoplasms	hsa-mir-199b	0.180664
Carcinoma, Squamous Cell	hsa-mir-15b	0.180593
Gastric Neoplasms	hsa-mir-200a	0.180593
Retinoblastoma	hsa-mir-7	0.180592
Diabetes Mellitus, Type 1	hsa-mir-146a	0.180479
Kidney Diseases	hsa-mir-21	0.180461
Mycosis Fungoides	hsa-mir-18a	0.18039
Crohn Disease	hsa-mir-145	0.180276
Nasopharyngeal Neoplasms	hsa-mir-126	0.18027
Eosinophilic Esophagitis	hsa-let-7a	0.180198
Barrett Esophagus	hsa-mir-183	0.180193
Uterine Cervical Neoplasms	hsa-mir-373	0.180138
Biliary Tract Neoplasms	hsa-mir-221	0.180136
Alzheimer Disease	hsa-mir-18a	0.180132
Colon Neoplasms	hsa-mir-92a	0.180115
Eosinophilic Esophagitis	hsa-mir-125b	0.180109
Leukemia, Myeloid, Acute	hsa-mir-663	0.180108
Thyroid Neoplasms	hsa-mir-196a	0.180054
Lung Neoplasms	hsa-mir-152	0.18003
Colonic Neoplasms	hsa-mir-451	0.17999
Cervical Neoplasms	hsa-mir-34c	0.179962
Leukemia, Myeloid	hsa-mir-663a	0.179951
Adrenocortical Carcinoma	hsa-mir-92a	0.179888
HIV Infection	hsa-mir-146a	0.179872
Pituitary Neoplasms	hsa-mir-98	0.179857
Uterine Cervical Neoplasms	hsa-mir-153	0.179798
Retinoblastoma	hsa-mir-15a	0.179684
Myocardial Reperfusion Injury	hsa-mir-155	0.179661
Glioma	hsa-mir-199a	0.17956
Uterine Cervical Neoplasms	hsa-mir-383	0.17951
Colonic Neoplasms	hsa-mir-182	0.179509
Neoplasms, Squamous Cell	hsa-mir-10a	0.179501
Long QT Syndrome	hsa-mir-30b	0.179456
Breast Neoplasms	hsa-mir-211	0.179398
Lymphoma	hsa-mir-22	0.179397
Prostate Neoplasms	hsa-mir-27b	0.17931
Cervical Neoplasms	hsa-mir-133b	0.179309
Thyroid Neoplasms	hsa-mir-107	0.179249
Retinoblastoma	hsa-mir-16	0.179196
Leukemia, Lymphocytic, Chronic, B-Cell	hsa-mir-214	0.179191
Diabetic Nephropathies	hsa-mir-146a	0.179184
Cholangiocarcinoma	hsa-mir-16	0.179152
Pituitary Neoplasms	hsa-mir-221	0.179146
Neoplasms	hsa-mir-212	0.179145
Schizophrenia	hsa-mir-19a	0.179073
Adrenal Cortex Neoplasms	hsa-mir-195	0.179051
Glioblastoma	hsa-mir-100	0.179023
Carcinoma, Squamous Cell	hsa-mir-373	0.179018
Precursor Cell Lymphoblastic Leukemia-Lymphoma	hsa-mir-34c	0.179015
Mycosis Fungoides	hsa-mir-19b	0.178966
Crohn Disease	hsa-let-7c	0.178832
Mycosis Fungoides	hsa-let-7c	0.178814
Liver Neoplasms	hsa-mir-152	0.178572
Multiple Myeloma	hsa-mir-26a	0.178511
Breast Neoplasms	hsa-mir-154	0.17835
Sarcoma, Ewing's	hsa-let-7b	0.178323
Glioblastoma	hsa-mir-376a	0.178301
Adenocarcinoma	hsa-mir-29b	0.178291
Uterine Cervical Neoplasms	hsa-mir-127	0.178283
Uterine Cervical Neoplasms	hsa-mir-135b	0.178252
Leukemia, lymphoblastic, Chronic	hsa-mir-19b	0.178241
Colorectal Neoplasms, Hereditary Nonpolyposis	hsa-mir-145	0.178213
Medulloblastoma	hsa-mir-205	0.178176
Liver Neoplasms	hsa-mir-146a	0.178135
Carcinoma, Non-Small-Cell Lung	hsa-mir-342	0.178079
Barrett Esophagus	hsa-mir-155	0.178063
Melanoma	hsa-mir-491	0.177914
Hepatitis B	hsa-mir-27a	0.177904
Lupus Erythematosus, Systemic	hsa-mir-183	0.17788
Cervical Neoplasms	hsa-mir-375	0.177868
Carcinoma, Small Cell	hsa-mir-182	0.17784
Gastric Neoplasms	hsa-mir-200c	0.177829
Head and Neck Neoplasms	hsa-mir-26a	0.177812
Schizophrenia	hsa-mir-19b	0.177805
Glioma	hsa-mir-376a	0.177734
Carcinoma, Hepatocellular	hsa-mir-495	0.177717
Leukemia, Lymphocytic, Chronic, B-Cell	hsa-let-7b	0.177714
Muscular Disorders, Atrophic	hsa-mir-127	0.177685
Leukemia, Myeloid, Acute	hsa-mir-328	0.177658
Precursor Cell Lymphoblastic Leukemia-Lymphoma	hsa-mir-19a	0.17764
Lymphoma, Primary Effusion	hsa-mir-16	0.177514
Reperfusion Injury	hsa-mir-145	0.177512
Carcinoma, Squamous Cell	hsa-let-7g	0.177494
Urinary Bladder Neoplasms	hsa-mir-32	0.177488
Gastrointestinal Neoplasms	hsa-mir-150	0.177421
ACTH-Secreting Pituitary Adenoma	hsa-mir-15b	0.177403
Biliary Tract Neoplasms	hsa-let-7e	0.177369
Lymphoma	hsa-let-7b	0.177311
Atherosclerosis	hsa-mir-122	0.177224
Stomach Neoplasms	hsa-mir-520h	0.17713
Arthritis, Rheumatoid	hsa-mir-125b	0.177107
Neuroblastoma	hsa-mir-106a	0.177078
Stomach Neoplasms	hsa-mir-381	0.177073
Nasopharyngeal Neoplasms	hsa-mir-203	0.177072
Adenoviridae Infections	hsa-mir-146a	0.177026
Glioblastoma	hsa-mir-10b	0.177021
Glioma	hsa-mir-223	0.176997
Cervical Neoplasms	hsa-mir-215	0.176997
Leukemia, Myelogenous, Chronic, BCR-ABL Positive	hsa-mir-10a	0.176964
Carcinoma, Non-Small-Cell Lung	hsa-mir-373	0.176949
Lymphoma, B-Cell	hsa-mir-125a	0.176834
Uterine Cervical Neoplasms	hsa-mir-30c	0.176828
Hepatitis B	hsa-mir-155	0.176761
Lupus Nephritis	hsa-mir-155	0.176713
Neuroblastoma	hsa-mir-218	0.176667
Medulloblastoma	hsa-mir-487b	0.176661
Waldenstrom Macroglobulinemia	hsa-mir-15a	0.176654
Lymphoma	hsa-mir-199b	0.176651
Ischemia	hsa-mir-146a	0.176595
Pancreatic Neoplasms	hsa-mir-373	0.176571
Adenoviridae Infections	hsa-mir-221	0.176571
Cardiomegaly	hsa-mir-30b	0.176556
Laryngeal Neoplasms	hsa-mir-34b	0.176541
Glioblastoma	hsa-mir-497	0.176462
Carcinoma	hsa-mir-199a	0.176459
Carcinoma, Squamous Cell	hsa-mir-30c	0.17645
Lung Neoplasms	hsa-mir-520c	0.176436
Hepatitis C	hsa-let-7c	0.176364
Arthritis, Rheumatoid	hsa-mir-145	0.176346
Prostate Neoplasms	hsa-mir-31	0.176297
Bladder Neoplasms	hsa-mir-200a	0.176278
Rectal Neoplasms	hsa-mir-486	0.176191
Glioblastoma	hsa-mir-144	0.176182
Colorectal Neoplasms	hsa-mir-663	0.176142
Pre-Eclampsia	hsa-mir-133a	0.176138
[truncated: 182,155 more rows]
